# The role of lineage, hemilineage and temporal identity in establishing neuronal targeting and connectivity in the *Drosophila* embryo

Brandon Mark<sup>1</sup>, Sen-Lin Lai<sup>1</sup>, Aref Arzan Zarin<sup>1</sup>, Laurina Manning<sup>1</sup>, Albert Cardona<sup>2</sup>, James W. Truman<sup>2,3</sup>, and Chris Q. Doe<sup>1\*</sup>

<sup>1</sup>Institute of Neuroscience, Institute of Molecular Biology, Howard Hughes Medical Institute, University of Oregon, Eugene, OR 97403

<sup>2</sup>Janelia Research Campus, Howard Hughes Medical Institute, Ashburn, VA 20147

<sup>3</sup>Friday Harbor Laboratories, University of Washington. Friday Harbor, WA 98250

\* Author for correspondence at [cdoe@uoregon.edu](mailto:cdoe@uoregon.edu)

Key words: neuroblast, hemilineage, temporal identity, pathfinding, cell lineage, neural circuits

## Abstract

The mechanisms specifying neuronal diversity are well-characterized, yet it remains unclear how these mechanisms are used to establish neuronal morphology and connectivity. Here we map the developmental origin of over 78 neurons from seven identified neural progenitors (neuroblasts) within a complete TEM reconstruction of the *Drosophila* larval CNS. This allowed us to correlate developmental mechanism with neuronal projection and synapse targeting. We find that clonally-related neurons from individual neuroblasts project widely in the neuropil without preferential circuit formation. In contrast, the two Notch<sup>ON</sup>/Notch<sup>OFF</sup> hemilineages from each neuroblast project to restricted dorsal/motor neuropil domains (Notch<sup>ON</sup>) and ventral/sensory neuropil domains (Notch<sup>OFF</sup>). Thus, each neuroblast contributes both motor and sensory processing neurons, although they share little connectivity. Lineage-specific constitutive Notch transforms sensory to motor hemilineages, showing hemilineage identity determines neuronal targeting. Within a hemilineage, neurons of different temporal cohorts target their synapses to different sub-domains of the neuropil. Importantly, neurons sharing a sub-domain defined by hemilineage and temporal identity preferentially connect to neurons of another hemilineage/temporal profile. We propose that the mechanisms that generate neural diversity are also determinants of neural circuit formation.

## Introduction

Tremendous progress has been made in understanding the molecular mechanisms generating neuronal diversity in both vertebrate and invertebrate model systems. In mammals, spatial cues generate distinct pools of progenitors which generate a diversity of neurons and glia appropriate for each spatial domain (1). The same process occurs in invertebrates like *Drosophila*, but with a smaller number of cells, and this process is particularly well-understood. Spatial patterning genes act combinatorially to establish single, unique progenitor (neuroblast) identity; these patterning genes include the dorsoventral columnar genes *vnd*, *ind*, *msb* (2-4) and the orthogonally expressed *wingless*, *hedgehog*, *gooseberry*, and *engrailed* genes (5-8). These factors endow each neuroblast with a unique spatial identity, the first step in generating neuronal diversity (Figure 1A, left). The second step occurs as each neuroblast “buds off” a series of ganglion mother cells (GMCs) which acquire a unique identity based on their birth-order, due to inheritance from the neuroblast of a “temporal transcription factor” – Hunchback (Hb), Krüppel (Kr), Pdm, and Castor (Cas) – which are sequentially expressed by nearly all embryonic neuroblasts (9). The combination of spatial and temporal factors leads to the production of a unique GMC with each neuroblast division (Figure 1A, middle). The third and final step in generating neuronal diversity is the asymmetric division of each GMC into a pair of post-mitotic neurons; during this division, the Notch inhibitor Numb (Nb) is partitioned into one neuron (Notch<sup>OFF</sup> neuron) whereas the other sibling neuron receives active Notch signaling (Notch<sup>ON</sup> neuron), thereby establishing two distinct hemilineages (10-13)(Figure 1A, right). In summary, three developmental mechanisms generate neuronal diversity within the embryonic CNS: neuroblast spatial identity, GMC temporal identity, and neuronal hemilineage identity.

A great deal of progress has also been made in understanding neural circuit formation in both vertebrates and invertebrate model systems, revealing a multi-step mechanism. Mammalian neurons initially target their axons to broad regions (e.g. thalamus/cortex), followed by targeting to a neuropil domain (glomeruli/layer), and finally forming highly specific synapses within the targeted domain (reviewed in 14).

Despite the progress in understanding the generation of neuronal diversity and the mechanisms governing axon guidance and neuropil targeting, how these two developmental processes are related remains unknown. While it is accepted that the identity of a neuron is tightly linked to its connectivity, the developmental mechanisms involved remain unclear. For example, do clonally-related neurons target similar regions of the neuropil due to the expression of similar guidance cues? Do temporal cohorts born at similar times show preferential connectivity? Are neurons expressing the same transcription factor preferentially interconnected? It may be that lineage, hemilineage, and temporal factors have independent roles in circuit formation; or that some mechanisms are used at different steps in circuit assembly; or that mechanisms used to generate neural diversity could be independent of those regulating circuit formation. Here we map neuronal developmental origin, neuropil targeting, and neuronal connectivity within a whole CNS TEM reconstruction (15). This provides us the unprecedented ability to identify correlations between development and circuit formation – at the level of single neurons/single synapses – and test those relationships to gain insight into how mechanisms known to generate diversity might be coupled to mechanisms of neural circuit formation. We find that lineage, hemilineage, and temporal identity are all strongly correlated with features of neuronal targeting that directly relate to establishing neural circuits.

## Results

### Clonally related neurons project widely within the neuropil

It is not possible to determine the clonal relationship of neurons in the TEM volume based on anatomical features alone; for example, clonally-related neurons are not ensheathed by glia as they are in grasshopper embryos or the *Drosophila* larval brain (16, 17). We took a multi-step approach to identify clonally-related neurons in the TEM reconstruction. First, we generated sparse neuroblast clones and imaged them by light microscopy. All neuroblasts assayed had a distinctive clonal morphology including the number of fascicles entering the neuropil, cell body position, and morphology of axon/dendrite projections (Figure 1B-G; and data not shown). The tendency for neuroblast clones to project one or two fascicles into the neuropil has also been noted for larval neuroblast clones (11-13). We assigned each clone to its parental neuroblast by comparing our clonal morphology to that seen following single neuroblast DiI labeling (18-20), and what has been reported previously for larval lineages (21, 22), as well as the position of the clone in the segment, and in some cases the presence of well-characterized individual neurons (e.g. the “looper” neurons in the NB2-1 clone). Note that we purposefully generated clones after the first-born Hb+ neurons, because the Hb+ neurons have cell bodies contacting the neuropil and do not fasciculate with later-born neurons in the clone, making it difficult to assign them to a specific neuroblast clone. We found that neurons in a single neuroblast clone, even without the Hb+ first-born neurons included, project widely throughout the neuropil, often targeting both dorsal motor neuropil and ventral sensory neuropil, as well as widely along the mediolateral axis of the neuropil (Figure 1B).

Next, we used these neuroblast lineage-specific features to identify the same clonally-related neurons in the TEM reconstruction. We identified neurons that had clustered cell bodies, clone morphology matching that seen by light microscopy (Figure 1C), and, with the exception of NB5-2 in segment A1R, one or two fascicles (Figure 1D,E). The similarity in overall clone morphology was striking (compare Figure 1B and 1C). We used two methods to validate the clonal relationship observed in the TEM reconstruction. We used neuroblast-specific Gal4 lines (13, 23) to generate MCFO labeling of single neurons, and found that in each case we could match the morphology of an MCFO-labeled single neuron from a known neuroblast to an identical single neuron in the same neuroblast clone within the TEM reconstruction (data not shown). We also showed that the TEM reconstruction had the same clone on the left and right side of abdominal segment 1 (A1), where it contained a similar number of neurons (Figure 1D, bottom) and had similar clonal morphology (data not shown). Overall, we mapped seven neuroblast clones into the TEM reconstruction (Figure 1F,G). In addition, our lab and others have previously mapped most of the NB3-3 neuronal progeny in the TEM reconstruction (24, 25). Thus, we have mapped almost 1/3 of all neurons in the A1L hemisegment (78/295) (Table 1). We conclude that each neuroblast clone has stereotyped cell body positions, 1-2 fascicles entering the neuropil, and widely projecting axons and dendrites.

### **Lineages generate two morphologically distinct classes of neurons, which project to dorsal and ventral regions of the neuropil.**

After mapping seven lineages into the EM volume, we observed that most lineages seemed to contain two broad classes of neurons with very different projection patterns. Recent work has shown that within a larval neuroblast lineage all Notch<sup>ON</sup> neurons have a similar clonal morphology (called the Notch<sup>ON</sup> hemilineage), whereas the Notch<sup>OFF</sup> hemilineage shares a different morphology (11-13). We hypothesized that the observed morphological differences may be due to hemilineage identity (Figure 2). First, we used NBLAST (26) to compare the morphology of clonally related neurons. We observed that five of the seven neuroblast lineages generated two highly distinct candidate hemilineages that each projected to a focused domain in the dorsal or ventral neuropil (Figure 2A-D; Fig. S1). A sixth neuroblast lineage, NB7-4, generated neurons projecting to the ventral neuropil, and a pool of glia (Figure 2E). The seventh neuroblast lineage, NB3-3 (Figure 2F), has

previously been shown to directly generate a single Notch<sup>OFF</sup> hemilineage due to direct differentiation of the neuroblast progeny as neurons, bypassing the terminal asymmetric cell division (25, 27). Interestingly, only the ventral candidate hemilineages contained intersegmental projection neurons (Fig. S2). We conclude that NBLAST can morphologically identify candidate hemilineages, and that each neuroblast generates a hemilineage projecting to the ventral neuropil, and one projecting to the dorsal neuropil (Figure 2G). Additionally, comparing morphologies of all neurons across seven lineages showed that while neurons from the same hemilineage are morphologically related, there is no morphological relationship between neurons of two different hemilineages despite being from the same neuroblast lineage (Figure 2H) suggesting that, like the larva, hemilineages offer a mechanism by which each lineage can essentially generate two totally different classes of neurons, thus doubling the diversity generated from a single lineage. Furthermore, the NB3-3 data raises the question of whether Notch<sup>OFF</sup> hemilineages target the ventral neuropil, and Notch<sup>ON</sup> hemilineages project to the dorsal neuropil.

### Hemilineage identity determines axon projection targeting to dorsal or ventral neuropil

We next wanted to validate the NBLAST hemilineage assignments, to determine whether Notch<sup>ON</sup> hemilineages always project to dorsal neuropil domains (and ventral neuropil for Notch<sup>OFF</sup> hemilineages), and to experimentally test whether hemilineage identity determines neuropil targeting. We can achieve all three goals by using Gal4 lines to drive expression of constitutively active Notch (Notch<sup>intra</sup>) in single neuroblast lineages to transform Notch<sup>OFF</sup> hemilineages into Notch<sup>ON</sup> hemilineages.

There are Gal4 lines specifically expressed in NB1-2, NB7-1, and MB7-4 (13, 28) which we used to drive Notch<sup>intra</sup> expression. Notch<sup>intra</sup> expression led to a loss of ventral projections in the NB1-2 and NB7-1 lineages, with a concomitant increase in dorsal neuropil projections (Figure 3A,B). For example, Notch<sup>intra</sup> expression throughout the NB1-2 lineage increased the number of ventral contralateral projections, and eliminated all dorsal ascending/descending projections (compare insets, Figure 3A,D). Similarly, Notch<sup>intra</sup> expression in the NB7-4 lineage led to a loss of ventral projections and an increase in the number of glia (Figure 3C); the loss of ventral neurons is apparent in both posterior views (Figure 3C,F) and dorsal views (insets, Figure 3C,F). These results strongly support the NBLAST assignments of neurons into two distinct hemilineages, and show that all tested neuroblast lineages make a Notch<sup>ON</sup> hemilineage that projects to the dorsal neuropil (or makes glia), and a Notch<sup>OFF</sup> hemilineage that projects to the ventral neuropil. This is a remarkable subdivision within each hemilineage, both because of the large difference in dorsoventral position as well as the difference in functional properties. In summary, neuroblasts are likely to contribute motor neurons and premotor neurons from their Notch<sup>ON</sup> hemilineage, and post-sensory neurons from their Notch<sup>OFF</sup> hemilineage. Most importantly, we show that hemilineage identity determines neuronal targeting to specific domains of dorsal or ventral neuropil.

### Hemilineage identity determines synapse targeting to motor or sensory neuropil domains

The observation that each lineage generates a dorsal and ventral hemilineage in a Notch dependent fashion suggests the possibility that each lineage is generating a class of neurons that project into the motor neuropil and the sensory neuropil (29-31). To confirm and expand our mapping of neuropil functional domains, we mapped the synapse position of pre-motor neurons and post-sensory neurons. We confirm previous findings (30-33) mapping the dorsal localization of motor neuron post-synaptic sites, the ventral location of sensory pre-synaptic sites, and the intermediate location of proprioceptive pre-synaptic sites (Figure 4A). Extending this analysis, we find pre-motor neurons target their post-synaptic sites to a broader dorsal neuropil territory,



and post-sensory neurons target their pre-synaptic sites to a broader ventral neuropil territory (Figure 4B,C) suggesting that the dorsoventral division of the neuropil into motor and sensory domains exists to the level of interneurons, and strengthens the possibility that neuroblast lineages are generating a sensory and a motor hemilineage.

To test this, we use the functional motor and sensory domains as landmarks to map synaptic localization for different hemilineages. We find that the dorsal hemilineages localize both pre- and post-synaptic sites to the motor neuropil, whereas ventral hemilineages localize both pre- and post-synaptic sites to the sensory neuropil (Figure 4D-G; Fig. S3), but see Discussion for caveats. Consistent with these observations, we find that the vast majority of sensory input to these neurons from these lineages is onto ventral hemilineages, and the vast majority of motor neuron input from these lineages comes from dorsal hemilineages (Figure 4H). We conclude that, at least for assayed hemilineages, Notch<sup>ON</sup> hemilineages target projections and synapses to the motor neuropil, whereas Notch<sup>OFF</sup> hemilineages target projections and synapses to the sensory neuropil (Figure 4I).

### Hemilineages target discrete regions of the neuropil.

After showing that hemilineages target restricted domains of dorsal or ventral neuropil, we asked if individual hemilineages tile the neuropil or have overlapping domains. We mapped the pre- and post-synaptic position for six ventral hemilineages and four dorsal hemilineages (excluding the NB7-4D glial hemilineage). We find that each of the dorsal hemilineages target pre-synapses and post-synapses to distinct but overlapping regions of the neuropil (Figure 5A,C). Similarly, each of the ventral hemilineages target pre-synapses and post-synapses to distinct but overlapping regions of the neuropil (Figure 5B,D). Clustering neurons by synapse similarity (a measure of synaptic distribution similarity) confirms that most neurons in a hemilineage cluster their pre- and post-synapses within the neuropil (Figure 5E). We conclude that neuroblast hemilineages contain neurons that project to distinct but overlapping neuropil regions, strongly suggesting that the developmental information needed for neuropil targeting is shared by neurons in a hemilineage, but not by all neurons in a complete neuroblast lineage (see Discussion).

### Mapping temporal identity in the TEM reconstruction: radial position is a proxy for neuronal birth-order

Most embryonic neuroblasts sequentially express the temporal transcription factors Hb, Kr, Pdm, and Cas with each factor inherited by the GMCs and young neurons born during each window of expression (reviewed in 34). Previous work has shown that early-born Hb+ neurons are positioned in a deep layer of the cellular cortex adjacent to the developing neuropil, whereas late-born Cas+ neurons are at the most superficial position, with Kr+ and Pdm+ neurons positioned in between (Figure 6A)(9, 35). Thus, in the late embryo, radial position can be used as a proxy for temporal identity (Figure 6B). To determine if this relationship is maintained in newly hatched larvae, we could not simply stain for Hb and Cas, as their expression is not reliably maintained in newly hatched larvae. Instead, we used more stable reporters for Hb (a recombinereed Hb:GFP transgene) and Cas (*cas-gal4* line driving *UAS-histone:RFP*). We confirm the radial position of Hb:GFP and Cas>RFP in the late embryonic CNS, and importantly, show that the same deep/superficial layering is maintained in newly hatched larvae (Figure 6C,D). Next, we identified 13 pairs of neurons shown previously to be born in the Hb+ or Cas+ temporal windows (Fig. S4). Additionally, we generated a new Hb-LexA construct in order to identify additional Hb+ neurons, which we then traced in the EM volume (Figure 6E,F, cyan neurons). We also used *cas-gal4* to drive MCFO in order to identify new late-born neurons which we were also able to trace in the TEM volume (Figure 6E,F magenta neurons). In total,

we identified 18 pairs of neurons with known birthdates. In order to quantify distance from the neuropil in the EM volume, we measured the neurite length between the cell body and the neuropil entry point. We found that all confirmed Hb+ neurons were located deep in the cellular cortex, close to the neuropil, whereas late-born neurons were located superficially in the cortex (Figure 6G,H). We also located all of these neurons in both the left and right hemisegments of A1 and found that left/right homologs had extremely similar cortex neurite lengths (Figure 6I). Thus, we confirm that cortex neurite length can be used as a proxy for temporal identity, is consistent across at least two hemisegments, and thus can be used to approximate the temporal identity of any neuron in the TEM reconstruction.

## Temporal identity subdivides hemilineage neuropil domains

In order to determine the role of temporal identity in neuronal targeting and connectivity we first used cortex neurite length to map the birthdates of all neurons in 10 hemilineages (Fig. S5). Unlike the striking dorsal-ventral division observed from mapping hemilineages, the synaptic distributions of individual temporal cohorts appeared far more overlapping (Fig. S5). To quantify this, we compared the synapse similarity of hemilineage-related neurons and temporal-related neurons and found that neurons related by hemilineage were more similar than those related by birthdate (Fig. S6). We conclude that hemilineages, not temporal cohorts, are more important determinants of neuropil targeting.

We next asked whether temporal identity subdivides each hemilineage to allow more precise “sub-regional” targeting of neuronal projections or synapses. Previous work has shown that temporal identity in NB3-3 plays a role in segregating neurons into distinct circuits (25). Early-born neurons (A08x/m) are involved in escape behaviors while late-born neurons (A08e1/2/3) are involved in proprioception (22). Interestingly, late-born NB3-3 neurons appeared to have more dorsal projections compared to early-born NB3-3 neurons, as well as project to different regions of the central brain (Figure 7A-C). We first calculated the mean cortex neurite length for all 11 pairs of neurons in NB3-3 left/right lineages, and found that in all but one case, late-born neurons all had longer cortex neurites than confirmed early-born neurons, further strengthening the use of cortex-neurite length as a birth-order proxy. We grouped the remaining neurons into temporal cohorts based on their cortex neurite lengths, and examined the spatial distribution of their pre and post-synaptic sites. Clustering of NB3-3 neurons by either pre or post-synaptic similarity found a near perfect correlation between birth-order and synapse similarity (Figure 7E,F). We conclude that the functional differences observed between temporal cohorts of NB3-3 neurons correlate with a subregionalization of pre- and post-synaptic sites.

We next tested whether sub-regionalization of synaptic targeting within a hemilineage by temporal cohorts is a general feature. To do this, we examined the relationship between birth-order and synaptic targeting across other hemilineages. Indeed, examination of the NB5-2 ventral hemilineage showed that early- and late-born neurons targeted their projections to “sub-regional” domains of the full hemilineage (Figure 8A,B). Additionally, both pre- and post-synaptic distributions were strongly correlated with birth-order (Figure 8C-H). Similar results were observed for pre-synaptic targeting (but not post-synaptic targeting) in the NB5-2 dorsal hemilineage (Figure 8I-P). Examination of all other hemilineages in this manner found that only one hemilineage did not have a significant correlation between birth-order and presynaptic targeting (NB1-2D) and only one hemilineage did not show a significant relationship between birth-order and post-synaptic targeting (NB5-2D). Pooling data from all hemilineages shows a positive correlation between synapse location and temporal identity (Figure 8Q). We conclude that temporal identity subdivides hemilineages into smaller populations of neurons that target both projections and synapses to different sub-

domains within the larger hemilineage targeting domain (Figure 8R). Thus, hemilineage identity provides coarse targeting within neuropil, and temporal identity refines targeting to several smaller sub-domains.

## Discussion

Many studies in *Drosophila* and mammals are based on the identification and characterization of clonally-related neurons, looking for common location (36, 37), identity (37, 38), or connectivity (39). Our results suggest that analyzing neuronal clones may be misleading due to the clone comprising two quite different hemilineages. For example, performing RNAseq on individual neuroblast lineages is unlikely to reveal key regulators of pathfinding or synaptic connectivity, due to the mixture of disparate neurons from two hemilineages.

Previous work on *Drosophila* larval neuroblasts show that the pair of hemilineages have different projection patterns and neurotransmitter expression (11-13). We extend these pioneering studies to embryonic neuroblasts, and show that pairs of hemilineages not only have different projection patterns, but also target pre- and post-synapses to distinct regions. Surprisingly, in all lineages where we performed Notch mis-expression experiments, neurons in the Notch<sup>ON</sup> hemilineage always projected to the dorsal neuropil, whereas Notch<sup>OFF</sup> neurons projected to the ventral neuropil. It is unlikely that all Notch<sup>ON</sup> hemilineages target the dorsal neuropil, however, as the NB1-1 interneuron pCC is from a Notch<sup>ON</sup> hemilineage (10) yet projects ventrally and receives strong sensory input, and its sibling aCC motor neuron is from the Notch<sup>OFF</sup> hemilineage (10) and projects dendrites in the dorsal motor neuropil. We think it is more likely that the Notch<sup>ON</sup>/Notch<sup>OFF</sup> provides a switch to allow each hemilineage to respond differently to dorsoventral guidance cues: in some cases the Notch<sup>ON</sup> hemilineage projects dorsally, and in some cases it projects ventrally. Nevertheless, our finding that neuroblasts invariably produce both sensory and motor hemilineages reveals the striking finding that the sensory and motor processing components of the neuropil are essentially being built in parallel, with one half of every GMC division contributing to either sensory or motor networks. This has not been observed in larval hemilineages, and may be the result of an evolutionary strategy to efficiently build the larval brain as fast as possible.

While we do observe some differences between embryonic and larval hemilineages, the similarities are far more striking. Previous work has shown that larval and embryonic hemilineages have similar morphological features (13), suggesting the possibility that these neurons could be performing analogous functions. Here we show that two components of a proprioceptor circuit, the Jaam and Saaghi neurons (24), are derived from two hemilineages of NB5-2 (also called lineage 6 (21)). Activation of either of these hemilineages in adults results in uncoordinated leg movement, consistent with the idea that these hemilineages could be involved in movement control. Similarly, adult activation of the NB3-3 lineage (also called lineage 8 (21)) caused postural effects, again consistent our previous findings that activation of this lineage in larvae cause postural defects (24). In the future, it will be interesting to further explore the functional and organizational similarities of the embryonic and larval nervous systems.

Our results suggest that all neurons in a hemilineage respond similarly to the global pathfinding cues that exist within the embryonic CNS. Elegant previous work showed that there are gradients of Slit and Netrin along the mediolateral axis (30), gradients of Semaphorin 2a along the dorsoventral axis (33), and gradients of Wnt5 along the anteroposterior axis (40). We would predict that the palette of receptors for these patterning cues would be shared by all neurons in a hemilineage, to allow them to target a specific neuropil domain; and different in each of the many hemilineages, to allow them to target different regions of the neuropil. Expression of constitutively-active Notch in single neuroblast lineages will make two Notch<sup>ON</sup> hemilineages

(see Figure 3), or expression of Numb will make two Notch<sup>OFF</sup> hemilineages. In this way it will be possible to obtain RNAseq data on neurons with a common neuropil targeting program.

We used the cortex neurite length of neurons as a proxy for birth-order and shared temporal identity. We feel this is a good approximation (see Figure 5 for validation), but it clearly does not precisely identify neurons born during each of the Hb, Kr, Pdm, Cas temporal transcription factor windows. In the future, using genetic immortalization methods may allow long-term tracking of neurons that only transiently express each of these factors. Nevertheless, we had sufficient resolution to show that neurons within a temporal cohort (similar cortex neurite length) could target their pre- and post-synapses to distinct sub-domains of each hemilineage targeting domain. Because we have performed this analysis on segment A1 left in a single TEM reconstruction, it remains unknown whether the temporal identity sub-domains arise stochastically due to self-avoidance mechanism (41) or by using spacing cues (42, 43), or by precise responses to global patterning cues. Previous work in the mushroom body has shown how changes in temporal transcription factor expression can affect targeting, and in the optic lobe it has been shown how these changes can effect downstream axon pathfinding genes (43, 44). It is possible a similar mechanism could be functioning in the ventral nerve cord. Recent work has shown that manipulation of temporal identity factors in larval motor neurons can predictably retarget motor neuron axons in NB7-1(28). The first five divisions of NB7-1 dorsal hemilineage produces U1-U5 motor neurons which target the dorsal muscle field. Normally, progressively later born U motor neurons target progressively more ventral muscles, similar to the subregionalization we observe in the central nervous system. Mis-expression Hb can collapse all five U motor neuron axons to a single muscle target suggesting that, like the mushroom body, temporal transcription factors exert control over axon targeting programs. These results offer exciting parallels to what we observe in the ventral nerve cord, and suggest clear experiments to test the role of temporal factors in subregionalization of hemilineage targeting.

Independent of the mechanism, our results strongly suggest that hemilineage identity and temporal identity act combinatorially to allow small pools of 2-6 neurons to target pre- and post-synapses to highly precise regions of the neuropil, thereby restricting synaptic partner choice. Hemilineage information provides coarse targeting, whereas temporal identity refines targeting within the parameters allowed by hemilineage targeting. Thus, the same temporal cue (e.g. Hb) could promote targeting of one pool of neurons in one hemilineage, and another pool of neurons in an adjacent hemilineage. This limits the number of regulatory mechanisms needed to generate precise neuropil targeting for all ~600 neurons in a segment of the CNS.

In this study we demonstrate how developmental information can be mapped into large scale connectomic datasets. We show that lineage information, hemilineage identity, and birth order information can all be accurately predicted using morphological features. This both greatly accelerates the ability to identify neurons in a large EM volume as well as sets up a framework in which to study development using datasets typically intended for studying connectivity and function. While the work presented here explores how mechanisms known to be involved in generating neural diversity can also contribute to the establishment of axon targeting and neuropil organization, in the future we hope to utilize this dataset to explore how these developmental mechanisms correlate with connectivity and function. It is likely that temporally distinct neurons have different connectivity due to their sub-regionalization of inputs and outputs, however testing how temporal cohorts of neurons are organized into circuits remains an open question.

## Methods summary

For detailed methods see Supplemental File 1. Fly stocks are mentioned in the text and described in more detail in the Supplemental Methods. We used standard confocal microscopy, immunocytochemistry and

MCFO methods (24, 45, 46). When adjustments to brightness and contrast were needed, they were applied to the entire image uniformly. Mosaic images to show different focal planes were assembled in Fiji or Photoshop. Neurons were reconstructed in CATMAID as previously described (15, 24, 47). Analysis was done using MATLAB. Statistical significance is denoted by asterisks: \*\*\*\* $p < 0.0001$ ; \*\*\* $p < 0.001$ ; \*\* $p < 0.01$ ; \* $p < 0.05$ ; n.s., not significant.

## Acknowledgements

We thank Haluk Lacin for unpublished fly lines. We thank Todd Lavery, Gerry Rubin, and Gerd Technau for fly stocks; Luis Sullivan, Emily Sales and Tim Warren for comments on the manuscript; Avinash Khandelwal and Laura Herren for annotating neurons; Keiko Hirono for generating transgenic constructs; and Keiko Hirono, Rita Yazejian, and Casey Doe for confocal imaging. Stocks obtained from the Bloomington *Drosophila* Stock Center (NIH P40OD018537) were used in this study. Funding was provided by HHMI (CQD, BM, LM, AAZ), NIH HD27056 (CQD), and NIH T32HD007348-24 (BM).



### Figure 1. Individual neuroblast progeny project widely within the neuropil

(A) Three mechanisms specifying neuronal diversity.  
 (B) Single neuroblast clones generated with *dpn(FRT.stop)LexA.p65* in newly-hatched larvae. We recovered  $n > 2$  clones for each lineage except NB4-1 whose lineage morphology is well characterized in (13); posterior view; scale bar, 20  $\mu$ m.  
 (C) The corresponding neurons traced in the TEM reconstruction. Dashed lines, neuropil border.  
 (D) Each clone has one or two fascicles at the site of neuropil entry (blue). Number of neurons per clone show below for A1L and A1R.  
 (E) Quantification of fascicle number at neuropil entry by light and EM microscopy.  
 (F,G) Seven neuroblast lineages traced in the TEM reconstruction; posterior view (F), lateral view (G).

### Figure 2. Lineages generate two morphological distinct classes of neurons which project to dorsal and ventral regions of the neuropil.

(A-F) NBLAST clustering for the indicated neuroblast progeny typically reveals two morphological groups (red/cyan) that project to dorsal or ventral neuropil; these are candidate hemilineages. Cluster cutoffs were set at 3.0 for all lineages.  
 (G) Superimposition of all dorsal candidate hemilineages (red) and all ventral candidate hemilineages (cyan).  
 (H) Dendrogram showing NBLAST results clustering neurons based on similar morphology. Clustered neurons were all from hemisegment A1L. Colored bars denote lineage identity.

### Figure 3. Hemilineage identity determines axon projection targeting to dorsal or ventral neuropil

(A-C) Wild type. Posterior view of three neuroblast lineages expressing GFP using single NB-Gal4 drivers (see methods for genetics). Note the projections to dorsal neuropil (red arrowhead) and ventral neuropil (cyan arrowhead). Insets, anterior view of A1-A8 segments. Note: NB7-4 makes neurons (cyan arrowhead) and glia (red arrowhead). Below: summaries. Blue channel is either FasII or Phalloidin.  
 (D-F) Notch<sup>intra</sup> mis-expression. Posterior view of three neuroblast lineages expressing GFP and constitutively active Notch<sup>intra</sup>. Note loss of the ventral projections and expansion of dorsal projections (red arrowhead). Insets, anterior view of A1-A8 segments.  $n > 3$  for all experiments. Below: summaries.

### Figure 4. Hemilineage identity determines synapse targeting to motor or sensory neuropil domains

(A) Spatial distributions of motor inputs (purple) and sensory outputs (green) show segregation of sensory axons and motor dendrites. Plots are 1D kernel density estimates for dorsoventral or mediolateral axes. Purple dots represent a single post-synaptic site. Green dots represent a single pre-synaptic site scaled by the number of outputs from that presynaptic site.  
 (B) Spatial distributions of pre-motor inputs (post-synaptic sites of any neuron with  $> 3$  synapses onto a motor neuron in segment A1), or post-sensory outputs (pre-synaptic sites of any neuron with  $> 3$  synapses with an A1 sensory neuron) show the dorsal/ventral segregation of sensory/motor processing is preserved one layer into the networks.  
 (C) 2D kernel density estimates of all pre/post synaptic sites for pre-motor and post-sensory neurons outlines the regions of sensory (green) and motor (magenta) processing in the VNC.  
 (D,E) Each lineage generates a sensory targeting hemilineage and a motor targeting hemilineage. 2D kernel density estimates of post-synaptic and pre-synaptic sites for four neuroblast hemilineages. Note the restricted domains, and how both pre- and post-synaptic sites remain in the same functional neuropil domain. Purple and green regions are the contour line denoting the greatest 40% of all pre-motor (purple) or post-sensory (green) synaptic densities.  
 (F,G) Pre- (F,F') and post- (G,G') synaptic density maps for all hemilineages.

(H) Connectivity diagram showing sensory neurons preferentially connect to neurons in ventral hemilineages, while motor neurons preferentially connect to neurons in dorsal hemilineages. Edges represent fractions of outputs for sensory neurons, and fraction of inputs for motor neurons.

(I) Summary showing that lineages generate a sensory and a motor processing hemilineage in a Notch-dependent manner.

### Figure 5. Different hemilineages target synapses to distinct domains of motor or sensory neuropil

(A,B) Presynaptic distributions of four hemilineages (A) or five ventral hemilineages (B) shown in posterior view. Dots represent single pre-synaptic sites with their size scaled by the number of outputs from a given pre-synaptic site.

(C,D) Postsynaptic distributions of four dorsal hemilineages (C) or five ventral hemilineages (D) shown in posterior view. Dots represent single postsynaptic sites.

(E) Neurons with similar synapse positions tend to be in the same hemilineage. Dendrogram clustering neurons based on combined synapse similarity. Combined synapse similarity was determined by calculating a similarity matrix for pre-synapses and post-synapses separately and then averaging similarity matrices.

### Figure 6. Mapping temporal identity in the TEM reconstruction: radial position is a proxy for neuronal birth-order

(A) Schematic showing correlation between temporal identity and radial position. Posterior view.

(B-D) Immunostaining to show the radial position of Hb+ and Cas+ neurons at embryonic stage 16 (B), recombineered *Hb:GFP* (C), or *cas-gal4 UAS-RFP* (D) newly-hatched larvae (L0).

(E) Single cell clones of either Hb or late-born neurons. Hb neurons were labeled using *hb-T2A-LexA* (see methods). Late-born neurons were labeled using *cas-Gal4; MCFO*. We use the term late-born as we can not rule Gal4 perdurance into neuroblast progeny born after Cas expression ends.

(F) Neurons identified in the TEM reconstruction that match those shown in E.

(G) All Hb+ and late-born neurons identified in the TEM reconstruction.

(H) Distribution of cortex neurite lengths for known Hb+ and late-born neurons shows that late-born neurons are further from the neuropil than Hb+ neurons.

(I) Left/right homologous pairs of neurons with verified birthdates show highly stereotyped cortex neurite lengths across two hemisegments. Solid red line represents a linear fit, with dotted red lines representing 95% CIs.  $R^2 = .87$ ,  $p = 1.4e-8$ .

### Figure 7. Birth order dependent subregionalization of neuropil targeting exhibited by NB3-3 neurons.

(A-C) Full 11 cell clone of NB3-3 in hemisegments A1L and A1R. Colors were assigned by dividing the lineage into two temporal cohorts on the basis of cortex neurite length with the exception of A08m, which has been shown previously to be born early.

(D) Plot of mean cortex neurite lengths across bilateral pairs of NB3-3 neurons. Colors are assigned by dividing the lineage into two temporal cohorts. Mean cortex neurite length for the lineage was  $18\mu\text{m}$ , with four neurons having less than the mean (cyan cells). A08m has a mean length greater than  $18\mu\text{m}$ , but has been shown previously to be early-born. Asterisks denote neurons with confirmed birthdates matching their color assignment. 6/7 previously birthdated neurons had cortex neurite lengths consistent with their birthdate.

(E) Postsynaptic similarity clustering of NB3-3 neurons shows two groups divided by temporal cohort. Postsynaptic distributions of these two populations of cells show a dorsoventral division consistent with their differential input from chordotonal neurons (early-born NB3-3 neurons) or proprioceptive sensory inputs (late-born NB3-3 neurons).

(F) Presynaptic similarity clustering of NB3-3 neurons again shows a clustering of early and late-born neurons with the exception of A08m. Presynaptic distributions of these two populations of cells show both a dorsoventral split in the VNC as well as differential target regions for the projection neurons in the brain.

**Figure 8. Birth-order dependent subregionalization of hemilineage targeting is a feature across many lineages.**

(A-H) NB5-2 ventral hemilineage. (A) NB5-2 ventral hemilineage (cyan, early-born; magenta, late-born). (B) Cortex neurite lengths of neurons in the hemilineage. (C-D) Presynaptic distributions of neurons in NB5-2V colored by birth-order. Little separation in the dorsoventral or mediolateral axes in the VNC was observed, but early-born neurons project axons to the brain while late-born neurons do not. (E-F) Presynaptic (E) and postsynaptic (F) similarity clustering of NB5-2V neurons shows neurons of a similar birth-order have similar synaptic positions. (G-H) Presynaptic (G) and postsynaptic (H) similarity plotted against birth order similarity. Birth-order similarity was defined as the pairwise Euclidean distance between cell bodies divided by the greatest pairwise distance between two cell bodies in the same hemilineage. Solid lines represent linear fits while dotted lines represent 95% CIs.

(I-L) NB5-2 dorsal hemilineage. (I) NB5-2 dorsal hemilineage (cyan, early-born; magenta, late-born). (J) Cortex neurite lengths of neurons in NB5-2D. (K-L) Presynaptic distributions of neurons in NB5-2D colored by birth-order. Little separation in A/P axis in the VNC was observed, early-born and late-born neurons segregate in the D/V and M/L axes. (M-N) Presynaptic (M) and postsynaptic (N) similarity clustering of NB5-2D neurons shows neurons of a similar birth-order have similar synaptic positions. (O-P) Presynaptic (O) and postsynaptic (P) similarity plotted against birth order similarity. Birth-order similarity was defined as the pairwise Euclidean distance between cell bodies divided by the greatest pairwise distance between two cell bodies in the same hemilineage. Solid lines represent linear fits while dotted lines represent 95% confidence interval. For NB5-2D, a significant relationship between postsynaptic targeting and birth-order was not observed.

(Q) Presynaptic (blue) and postsynaptic (red) similarity plotted against birth order similarity across nine hemilineages. NB1-2V was excluded as it only contained two neurons. When examined separately, only one hemilineage (NB1-2D) did not show a significant relationship between presynaptic similarity and birth-order similarity, and only one hemilineage (NB5-2D) did not show a significant relationship between postsynaptic similarity and birth-order similarity. Solid lines represent linear fits, and dashed lines represent 95% confidence interval.

(R) Summary showing hemilineage targeting setting up broad neuropil targeting and temporal information sub-regionalizing hemilineage targeting.

**Fig. S1. NB2-1 has two hemilineages containing neurons with similar “looper” morphology**

(A) NBLAST dendrogram showing two candidate hemilineages (red, cyan) and two outlier neurons. Note that all neurons are highly similar compared to those shown in Figure 2, raising the question of whether they are a single hemilineage.

(B-B') NB2-1 lineage generates both Notch<sup>OFF</sup> neurons (cyan arrowhead) and Notch<sup>ON</sup> neurons (red arrowhead) as detected by the Notch reporter Hey. Thus, NB2-1 generates two hemilineages.

(C-C') TEM reconstruction of the NB2-1 neurons and a schematic showing two hemilineages (red, cyan) and two outliers (green, magenta). While A02o and A02l fasciculate with the other A02 neurons in at least four hemisegments, we never generated a clone containing either, and therefore chose to exclude them from further analysis.

**Fig. S2. Ventral hemilineages have projection neurons**

The indicated neuroblast lineages traced in catmaid showing the dorsal (red) and ventral (cyan) predicted hemilineages. Note that the ventral (cyan) hemilineages contains significantly longer axons (ascending and descending projection neurons) compared to dorsal (red) hemilineage neurons consistent with what has been observed in larva (Truman, 2010).  $P = .0034$ , via 2-sided Wilcoxon rank sum test.

**Fig. S3. Hemilineage identity determines synapse targeting to motor or sensory neuropil domains**

2D kernel density estimates for all hemilineages not shown in Figure 4. Density maps are of post-synaptic and pre-synaptic densities for four neuroblast lineages. Note the restricted domains, and how both pre- and post-synaptic sites remain in the same functional neuropil domain. Green and magenta regions represent density estimates for the pre-motor and post-sensory neurons for segment A1.

**Fig. S4. Known Hb+ or Cas+ neurons identified in the TEM reconstruction**

Cyan: neurons known to be Hb+. Magenta, neurons known to be Cas+. Posterior view, midline, dashed line; inset, dorsal view, anterior up.

**Fig. S5. Neurons with a common temporal identity project widely within the neuropil**

(A-F) Skeletons of 6 lineages colored by inferred birth order (cyan, early-born) to (magenta, late-born).

Posterior view, dorsal up.

(G) Quantification of cortex neurite length in each neuroblast lineage.

(H) Overlay of all six lineages; note the intermingling of early- and late-born neuronal projections.

(I,J) Pre- or post-synapse distributions of neurons position labeled by neuronal temporal identity; note the intermingling of synapses from early- and late-born neurons.

**Fig. S6. Neurons in a hemilineage have more similar synaptic targeting than neurons in a temporal cohort.**

(A) Combined synapse similarity clustering similar to Figure 5E. Neuron names are colored either by hemilineage or by temporal cohort. Note the lack of coherent clusters of temporally-related neurons from different hemilineages.

(B) Mean combined synapse similarity of neurons from hemilineages or temporal cohorts. Mean similarity was calculated by randomly selecting pairs of neurons in the same hemilineage or the same temporal cohort 100 times.  $p < .0001$  via 2-sided Wilcoxon rank sum test.

## References

1. Jessell TM (2000) Neuronal specification in the spinal cord: inductive signals and transcriptional codes. *Nature reviews. Genetics* 1(1):20-29.
2. McDonald JA, *et al.* (1998) Dorsoventral patterning in the Drosophila central nervous system: the vnd homeobox gene specifies ventral column identity. *Genes Dev* 12(22):3603-3612.
3. Weiss JB, *et al.* (1998) Dorsoventral patterning in the Drosophila central nervous system: the intermediate neuroblasts defective homeobox gene specifies intermediate column identity. *Genes Dev* 12(22):3591-3602.
4. Isshiki T, Takeichi M, & Nose A (1997) The role of the msh homeobox gene during Drosophila neurogenesis: implication for the dorsoventral specification of the neuroectoderm. *Development (Cambridge, England)* 124(16):3099-3109.
5. McDonald JA & Doe CQ (1997) Establishing neuroblast-specific gene expression in the Drosophila CNS: huckebein is activated by Wingless and Hedgehog and repressed by Engrailed and Gooseberry. *Development (Cambridge, England)* 124(5):1079-1087.
6. Skeath JB, Zhang Y, Holmgren R, Carroll SB, & Doe CQ (1995) Specification of neuroblast identity in the Drosophila embryonic central nervous system by gooseberry-distal. *Nature* 376(6539):427-430.
7. Zhang Y, Ungar A, Fresquez C, & Holmgren R (1994) Ectopic expression of either the Drosophila gooseberry-distal or proximal gene causes alterations of cell fate in the epidermis and central nervous system. *Development (Cambridge, England)* 120(5):1151-1161.
8. Chu-LaGriffa Q & Doe CQ (1993) Neuroblast specification and formation regulated by wingless in the Drosophila CNS. *Science (New York, N.Y.)* 261(5128):1594-1597.
9. Isshiki T, Pearson B, Holbrook S, & Doe CQ (2001) Drosophila neuroblasts sequentially express transcription factors which specify the temporal identity of their neuronal progeny. *Cell* 106(4):511-521.
10. Skeath JB & Doe CQ (1998) Sanpodo and Notch act in opposition to Numb to distinguish sibling neuron fates in the Drosophila CNS. *Development (Cambridge, England)* 125(10):1857-1865.
11. Truman JW, Moats W, Altman J, Marin EC, & Williams DW (2010) Role of Notch signaling in establishing the hemilineages of secondary neurons in Drosophila melanogaster. *Development (Cambridge, England)* 137(1):53-61.
12. Harris RM, Pfeiffer BD, Rubin GM, & Truman JW (2015) Neuron hemilineages provide the functional ground plan for the Drosophila ventral nervous system. *eLife* 4.
13. Lacin H & Truman JW (2016) Lineage mapping identifies molecular and architectural similarities between the larval and adult Drosophila central nervous system. *eLife* 5:e13399.
14. Kolodkin AL & Tessier-Lavigne M (2011) Mechanisms and molecules of neuronal wiring: a primer. *Cold Spring Harbor perspectives in biology* 3(6).
15. Ohyama T, *et al.* (2015) A multilevel multimodal circuit enhances action selection in Drosophila. *Nature* 520(7549):633-639.
16. Doe CQ & Goodman CS (1985) Early events in insect neurogenesis. I. Development and segmental differences in the pattern of neuronal precursor cells. *Developmental biology* 111(1):193-205.
17. Dumstrei K, Wang F, & Hartenstein V (2003) Role of DE-cadherin in neuroblast proliferation, neural morphogenesis, and axon tract formation in Drosophila larval brain development. *The Journal of neuroscience : the official journal of the Society for Neuroscience* 23(8):3325-3335.
18. Bossing T, Udolph G, Doe CQ, & Technau GM (1996) The embryonic central nervous system lineages of Drosophila melanogaster. I. Neuroblast lineages derived from the ventral half of the neuroectoderm. *Developmental biology* 179(1):41-64.
19. Schmid A, Chiba A, & Doe CQ (1999) Clonal analysis of Drosophila embryonic neuroblasts: neural cell types, axon projections and muscle targets. *Development (Cambridge, England)* 126(21):4653-4689.
20. Schmidt H, *et al.* (1997) The embryonic central nervous system lineages of Drosophila melanogaster. II. Neuroblast lineages derived from the dorsal part of the neuroectoderm. *Developmental biology* 189(2):186-204.
21. Lacin H & Truman JW (2016) Lineage mapping identifies molecular and architectural similarities between the larval and adult Drosophila central nervous system. *eLife* 5:eLife.13399.
22. Birkholz O, Rickert C, Nowak J, Coban IC, & Technau GM (2015) Bridging the gap between postembryonic cell lineages and identified embryonic neuroblasts in the ventral nerve cord of Drosophila melanogaster. *Biology open* 4(4):420-434.
23. Kohwi M, Lupton JR, Lai SL, Miller MR, & Doe CQ (2013) Developmentally regulated subnuclear genome reorganization restricts neural progenitor competence in Drosophila. *Cell* 152(1-2):97-108.
24. Heckscher ES, *et al.* (2015) Even-Skipped(+) Interneurons Are Core Components of a Sensorimotor Circuit that Maintains Left-Right Symmetric Muscle Contraction Amplitude. *Neuron* 88(2):314-329.



25. Wreden CC, *et al.* (2017) Temporal Cohorts of Lineage-Related Neurons Perform Analogous Functions in Distinct Sensorimotor Circuits. *Current biology : CB* 27(10):1521-1528.e1524.
26. Costa M, Manton JD, Ostrovsky AD, Prohaska S, & Jefferis GS (2016) NBLAST: Rapid, Sensitive Comparison of Neuronal Structure and Construction of Neuron Family Databases. *Neuron* 91(2):293-311.
27. Baumgardt M, *et al.* (2014) Global programmed switch in neural daughter cell proliferation mode triggered by a temporal gene cascade. *Developmental cell* 30(2):192-208.
28. Seroka AQ & Doe CQ (2019) The Hunchback temporal transcription factor determines motor neuron axon and dendrite targeting in *Drosophila*. *Development (Cambridge, England)*.
29. Merritt DJ & Whittington PM (1995) Central projections of sensory neurons in the *Drosophila* embryo correlate with sensory modality, soma position, and proneural gene function. *J Neurosci* 15(3 Pt 1):1755-1767.
30. Zlatić M, Landgraf M, & Bate M (2003) Genetic specification of axonal arbors: atonal regulates robo3 to position terminal branches in the *Drosophila* nervous system. *Neuron* 37(1):41-51.
31. Landgraf M, Jeffrey V, Fujioka M, Jaynes JB, & Bate M (2003) Embryonic origins of a motor system: motor dendrites form a myotopic map in *Drosophila*. *PLoS Biol* 1(2):E41.
32. Mauss A, Tripodi M, Evers JF, & Landgraf M (2009) Midline signalling systems direct the formation of a neural map by dendritic targeting in the *Drosophila* motor system. *PLoS Biol* 7(9):e1000200.
33. Zlatić M, Li F, Strigini M, Grueber W, & Bate M (2009) Positional cues in the *Drosophila* nerve cord: semaphorins pattern the dorso-ventral axis. *PLoS Biol* 7(6):e1000135.
34. Doe CQ (2017) Temporal Patterning in the *Drosophila* CNS. *Annu. Rev. Cell Dev. Biol.* 33:in press.
35. Kambadur R, *et al.* (1998) Regulation of POU genes by castor and hunchback establishes layered compartments in the *Drosophila* CNS. *Genes Dev* 12(2):246-260.
36. Fekete DM, Perez-Miguelsanz J, Ryder EF, & Cepko CL (1994) Clonal analysis in the chicken retina reveals tangential dispersion of clonally related cells. *Developmental biology* 166(2):666-682.
37. Mihalas AB & Hevner RF (2018) Clonal analysis reveals laminar fate multipotency and daughter cell apoptosis of mouse cortical intermediate progenitors. *Development (Cambridge, England)* 145(17).
38. Wong LL & Rapaport DH (2009) Defining retinal progenitor cell competence in *Xenopus laevis* by clonal analysis. *Development (Cambridge, England)* 136(10):1707-1715.
39. Yu YC, Bultje RS, Wang X, & Shi SH (2009) Specific synapses develop preferentially among sister excitatory neurons in the neocortex. *Nature* 458(7237):501-504.
40. Yoshikawa S, McKinnon RD, Kokel M, & Thomas JB (2003) Wnt-mediated axon guidance via the *Drosophila* Derailed receptor. *Nature* 422(6932):583-588.
41. Zipursky SL & Grueber WB (2013) The molecular basis of self-avoidance. *Annual review of neuroscience* 36:547-568.
42. Petrovic M & Hummel T (2008) Temporal identity in axonal target layer recognition. *Nature* 456(7223):800-803.
43. Kulkarni A, Ertekin D, Lee CH, & Hummel T (2016) Birth order dependent growth cone segregation determines synaptic layer identity in the *Drosophila* visual system. *eLife* 5:e13715.
44. Zhu S, *et al.* (2006) Gradients of the *Drosophila* Chinmo BTB-zinc finger protein govern neuronal temporal identity. *Cell* 127(2):409-422.
45. Clark MQ, McCumsey SJ, Lopez-Darwin S, Heckscher ES, & Doe CQ (2016) Functional Genetic Screen to Identify Interneurons Governing Behaviorally Distinct Aspects of *Drosophila* Larval Motor Programs. *G3 (Bethesda)*.
46. Syed MH, Mark B, & Doe CQ (2017) Steroid hormone induction of temporal gene expression in *Drosophila* brain neuroblasts generates neuronal and glial diversity. *eLife* 6.
47. Carreira-Rosario A, *et al.* (2018) MDN brain descending neurons coordinately activate backward and inhibit forward locomotion. *eLife* 7.

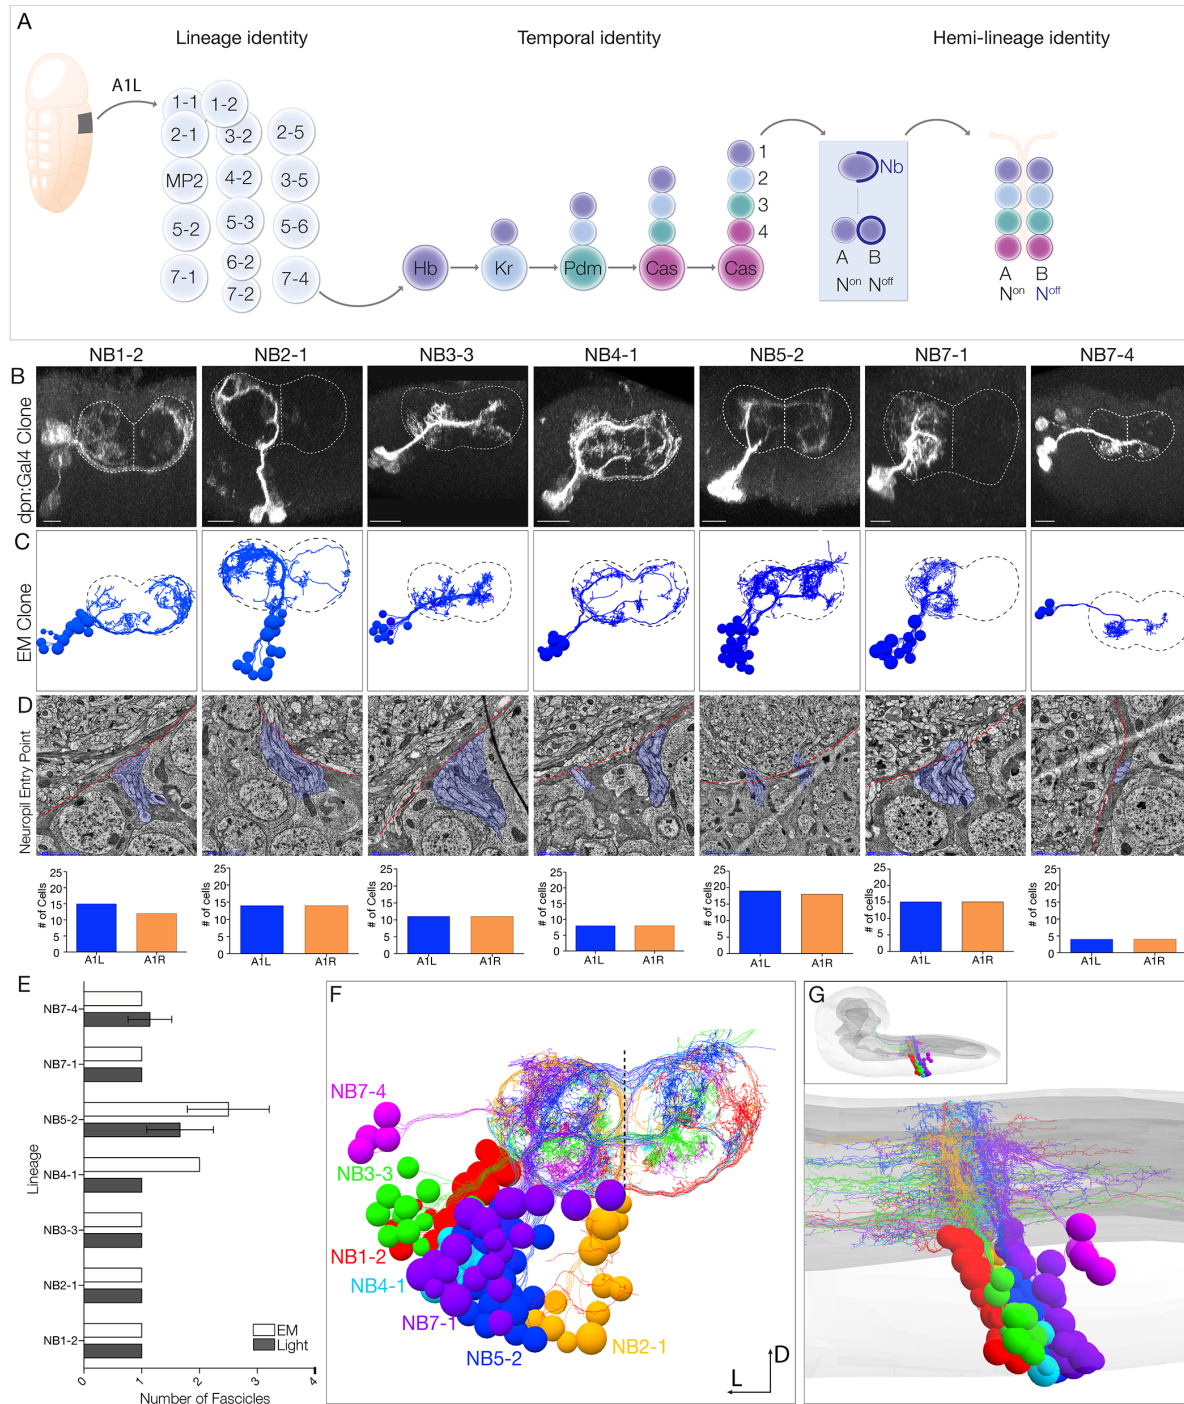

Figure 1

637

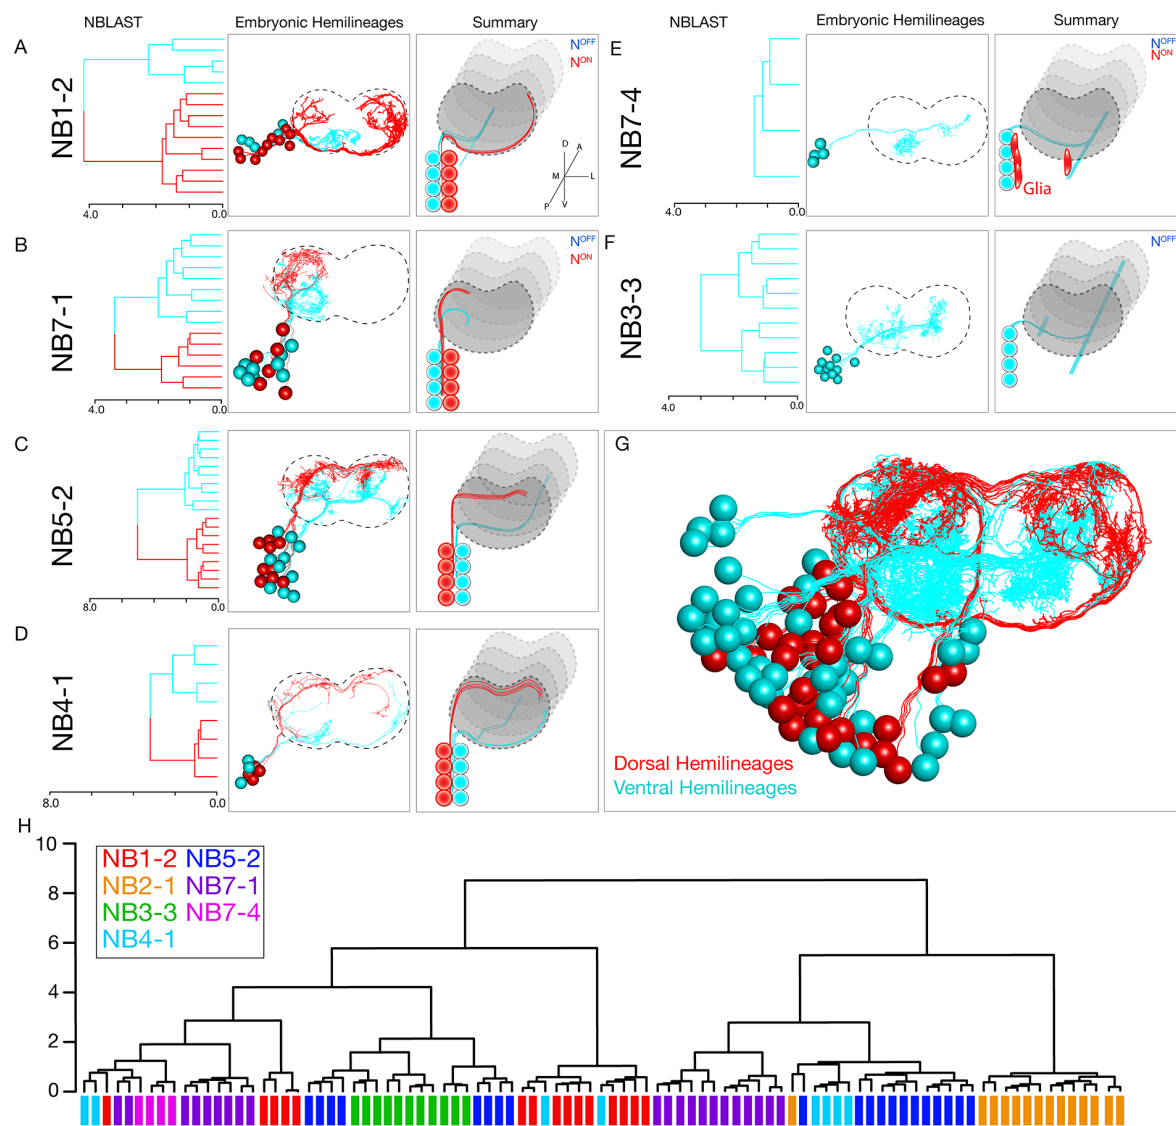

Figure 2



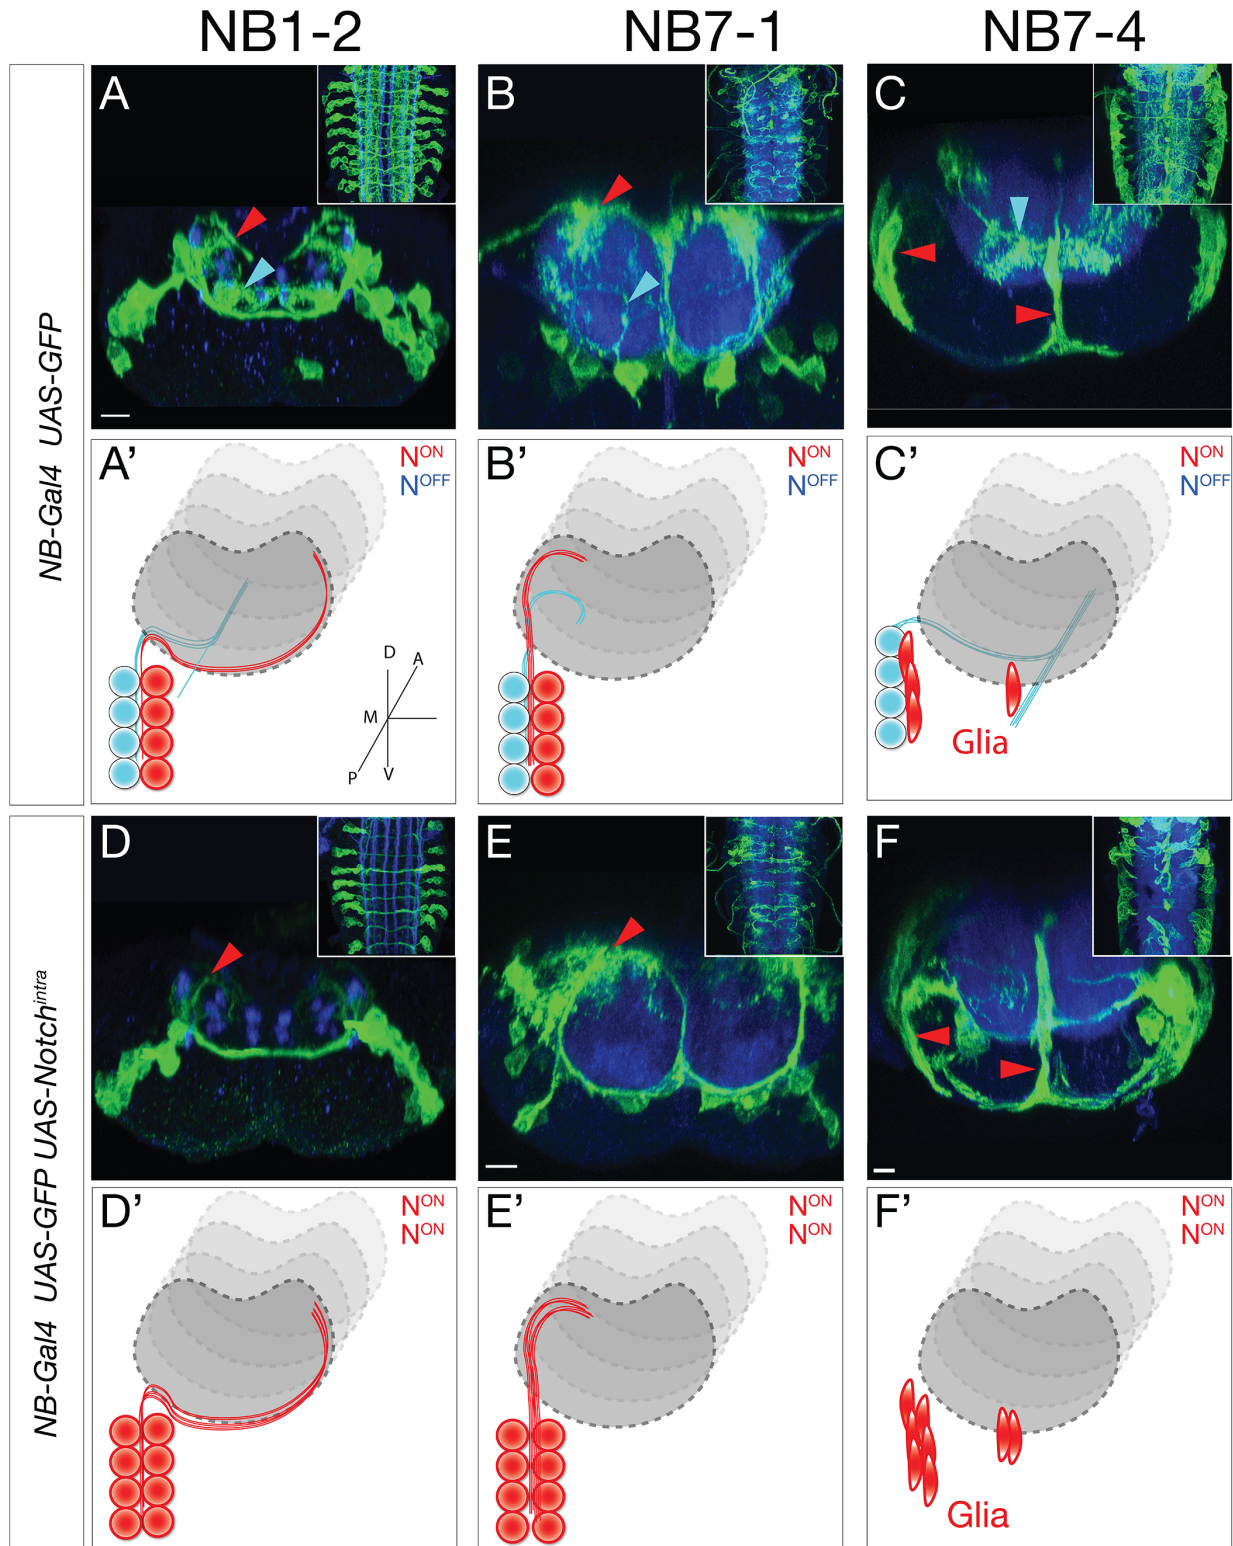

Figure 3

639

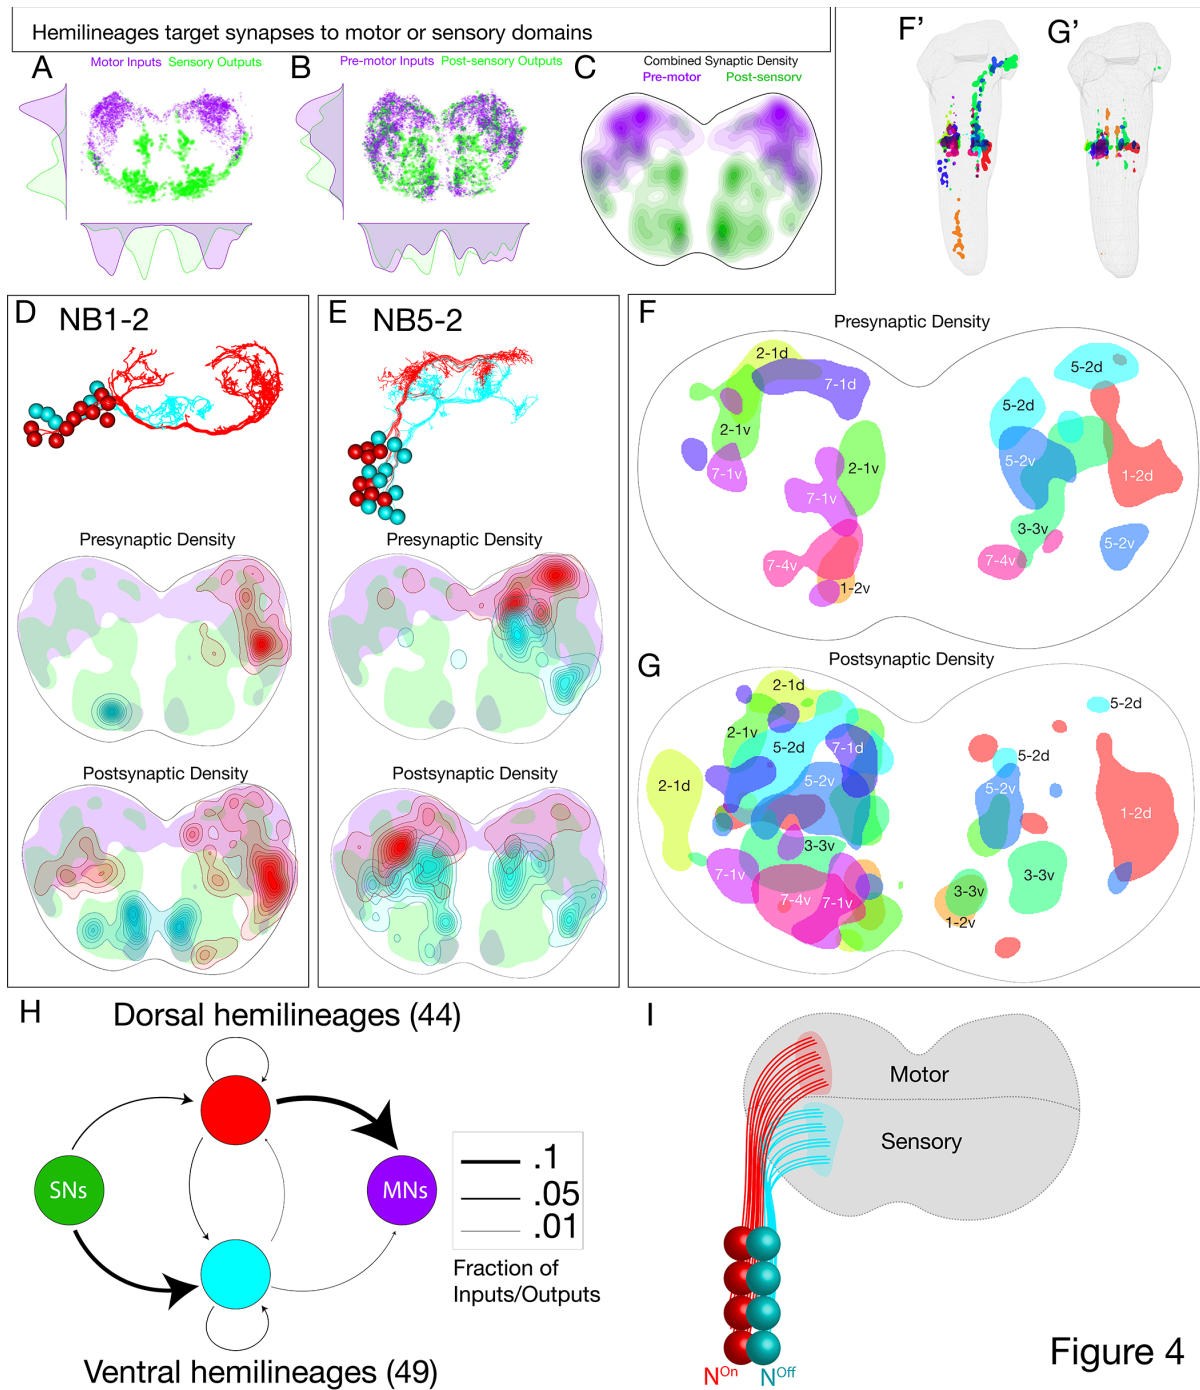

640



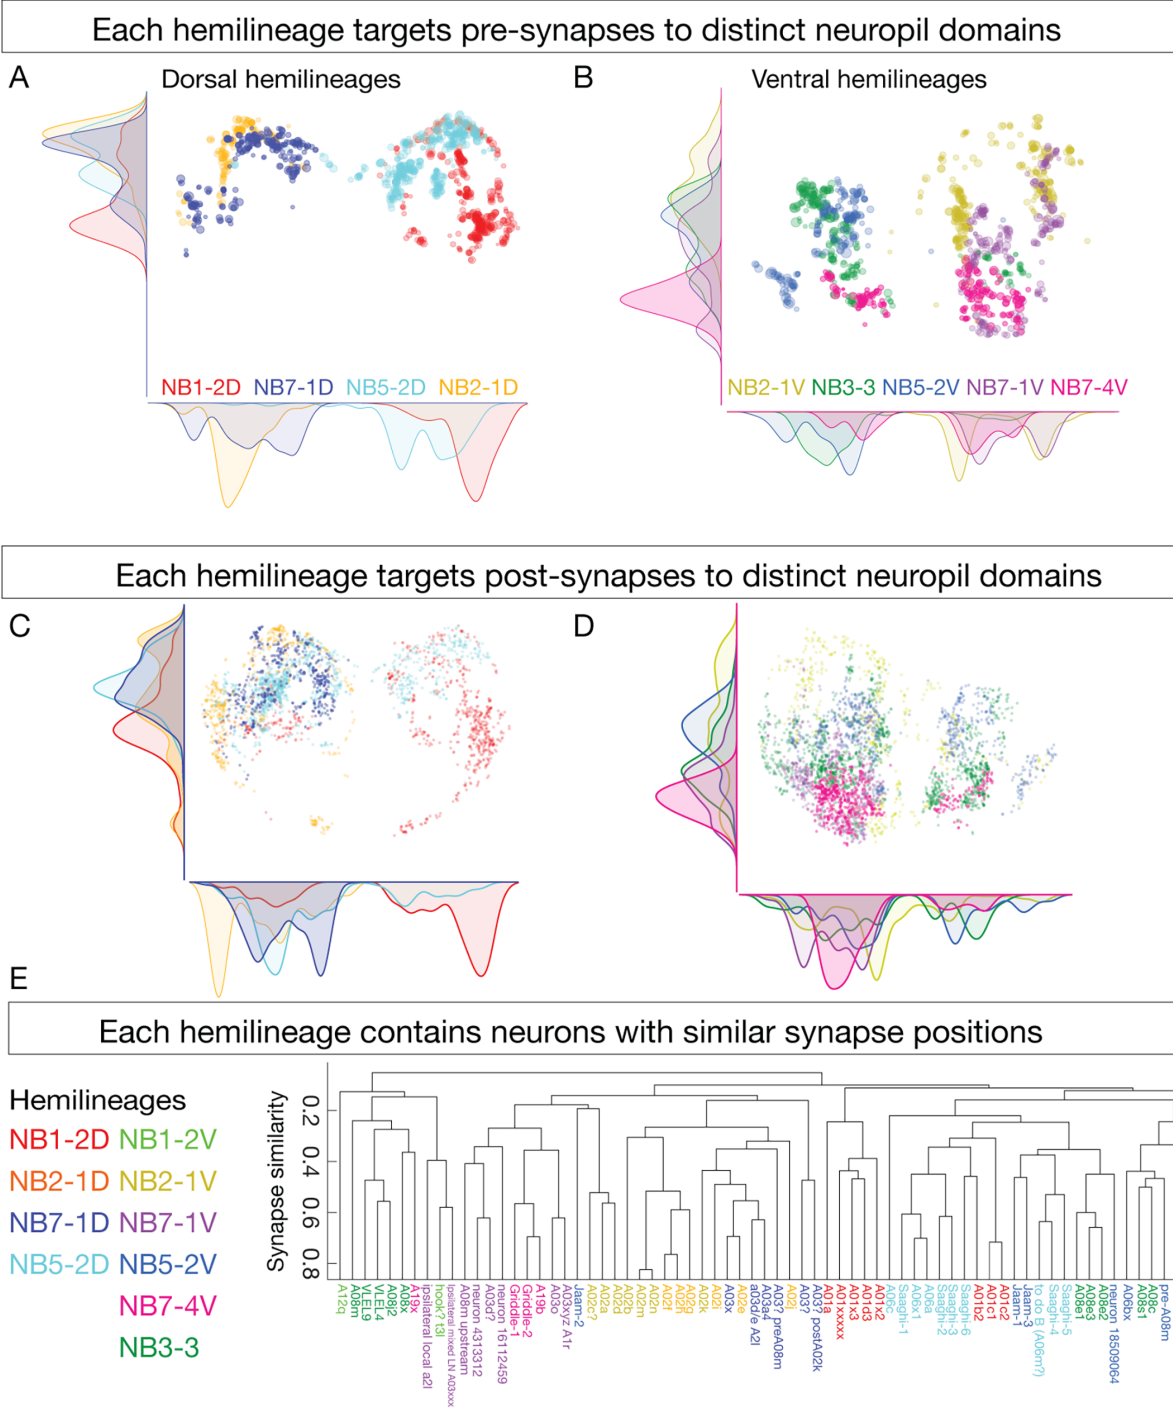

Figure 5

641

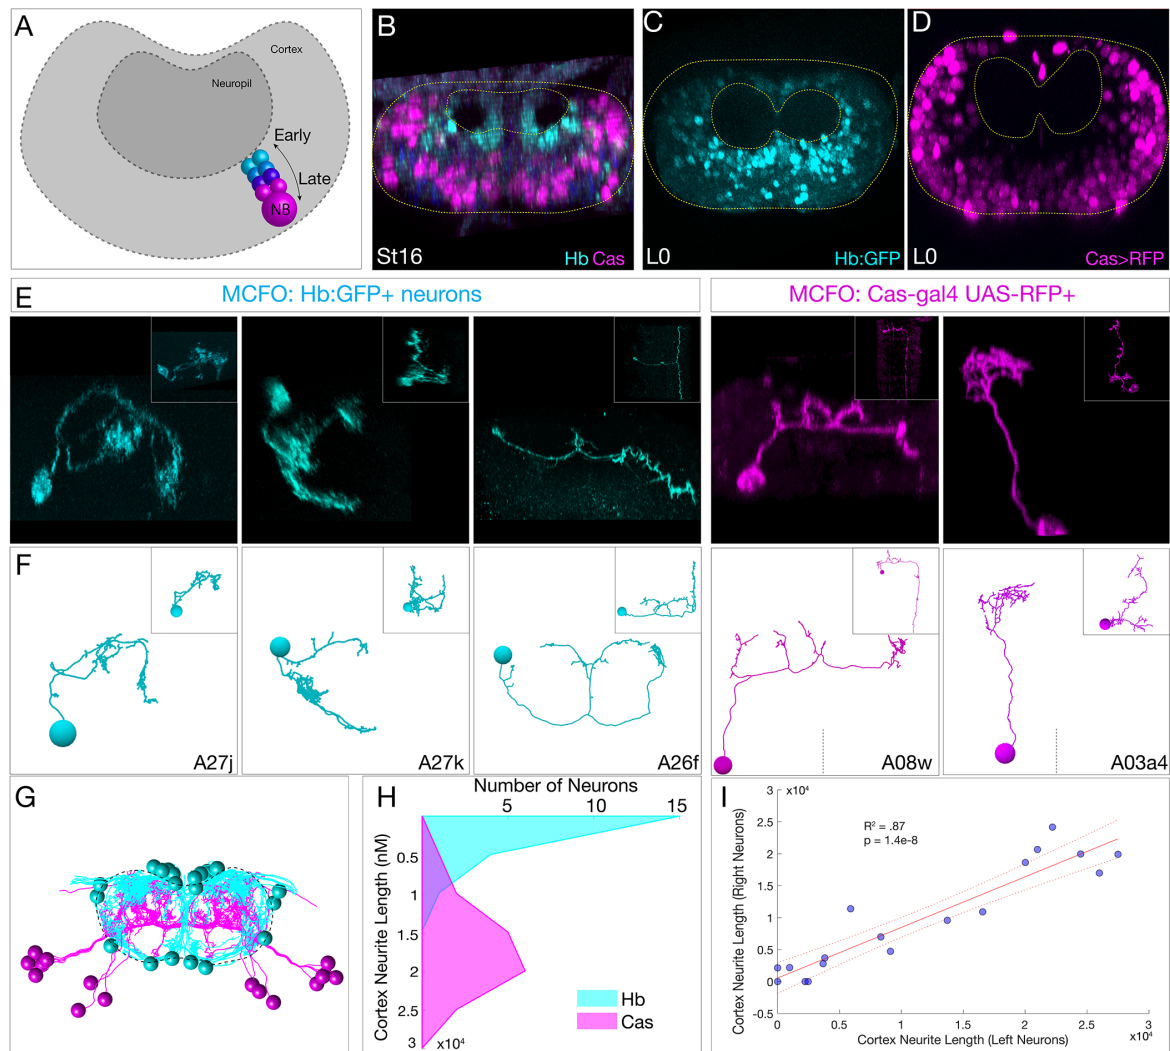

Figure 6

642

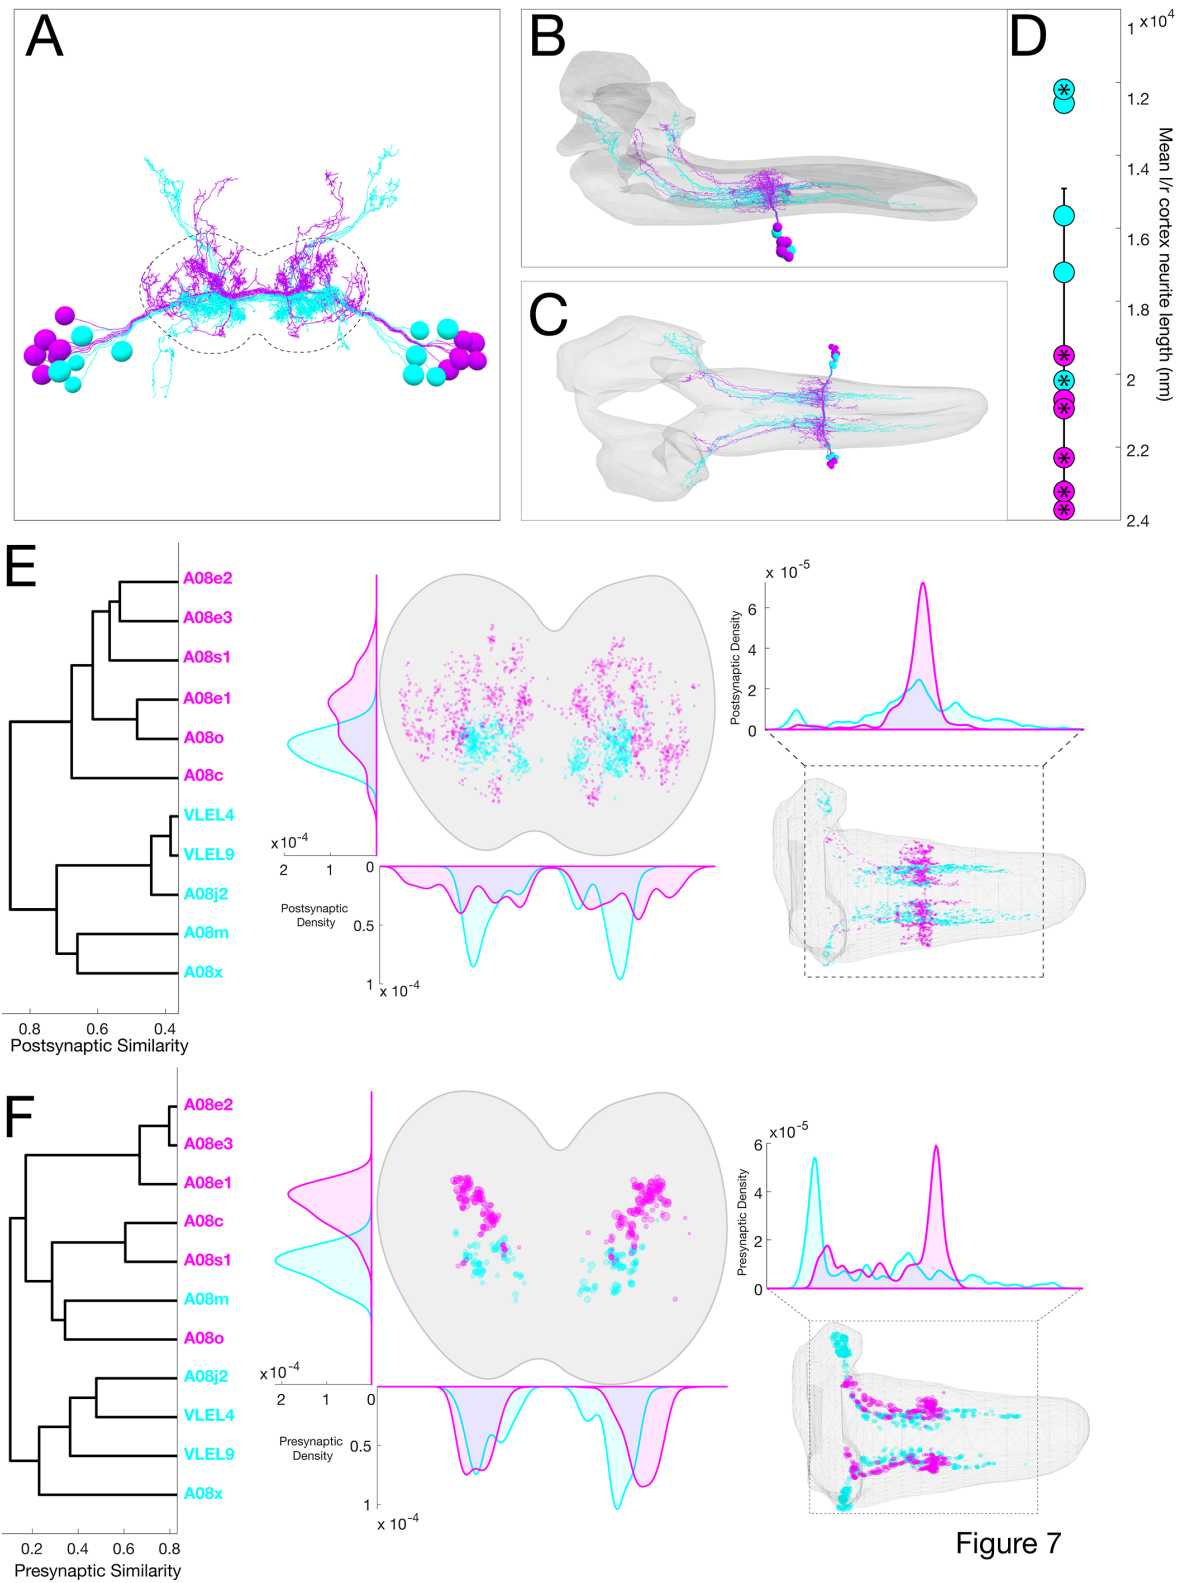

Figure 7

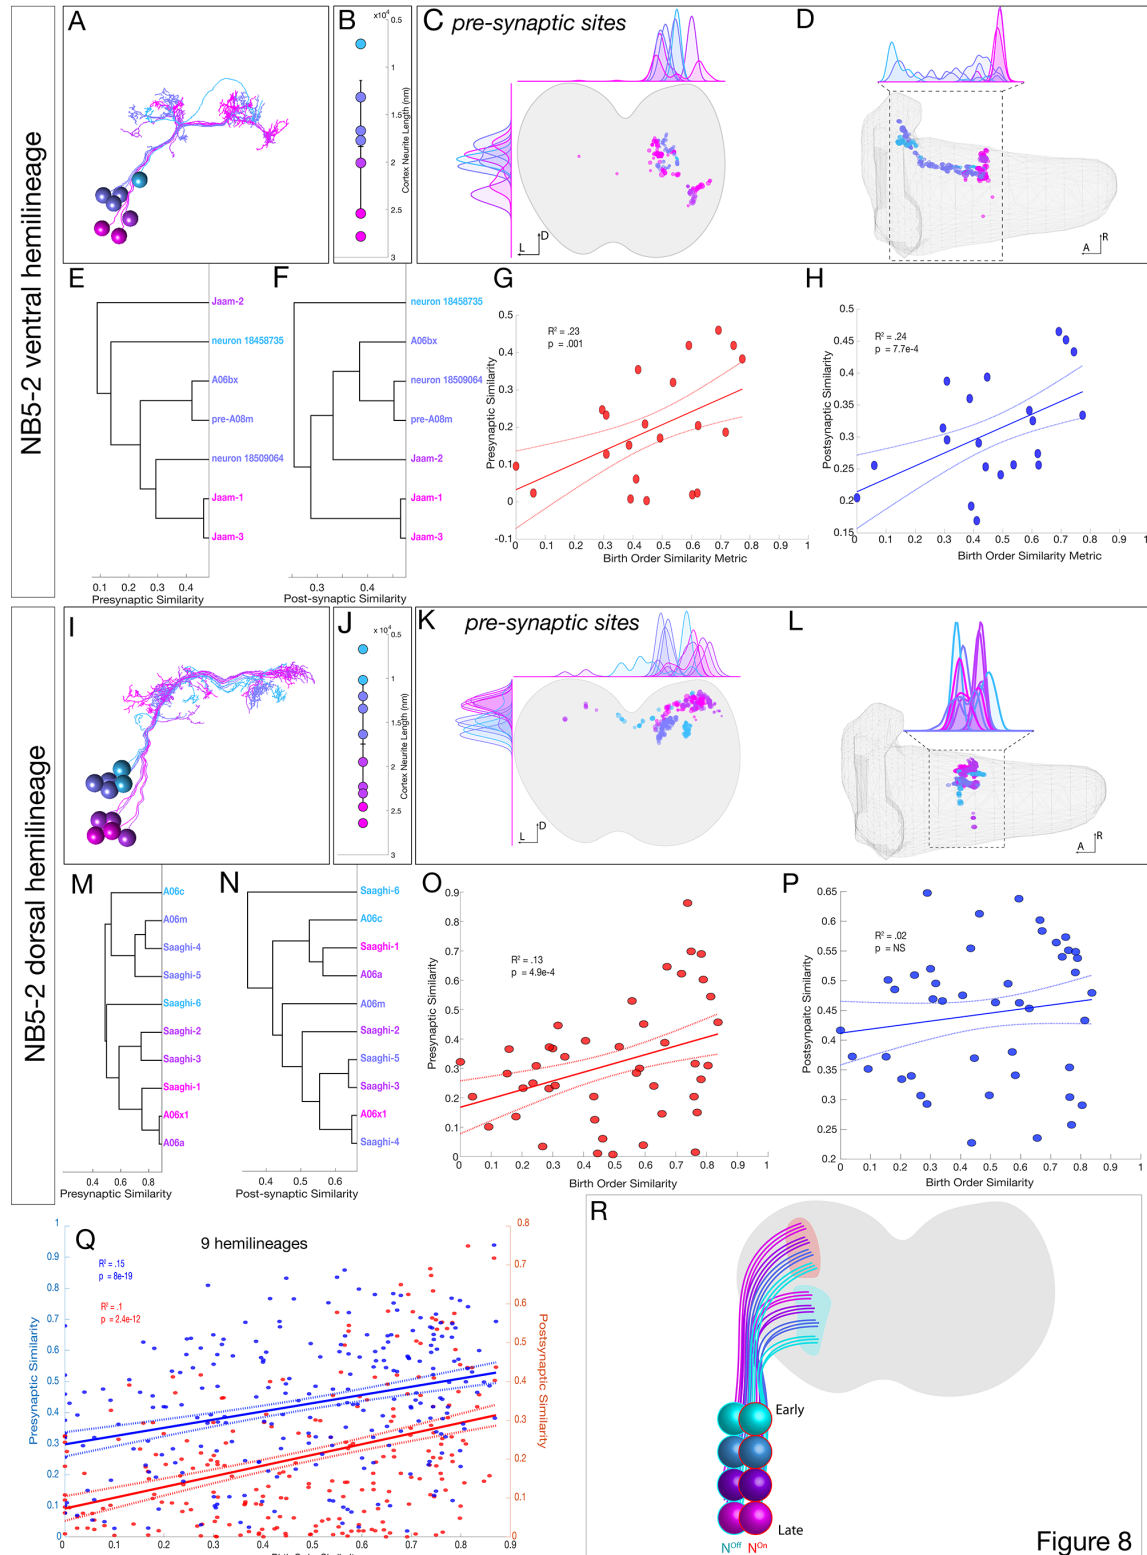

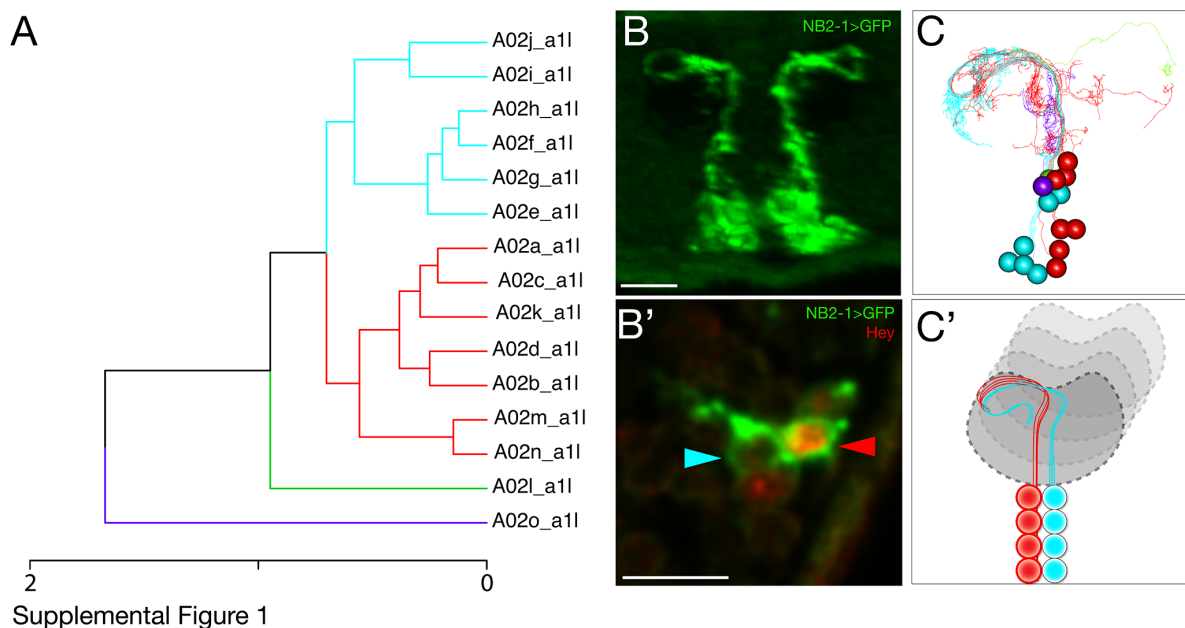



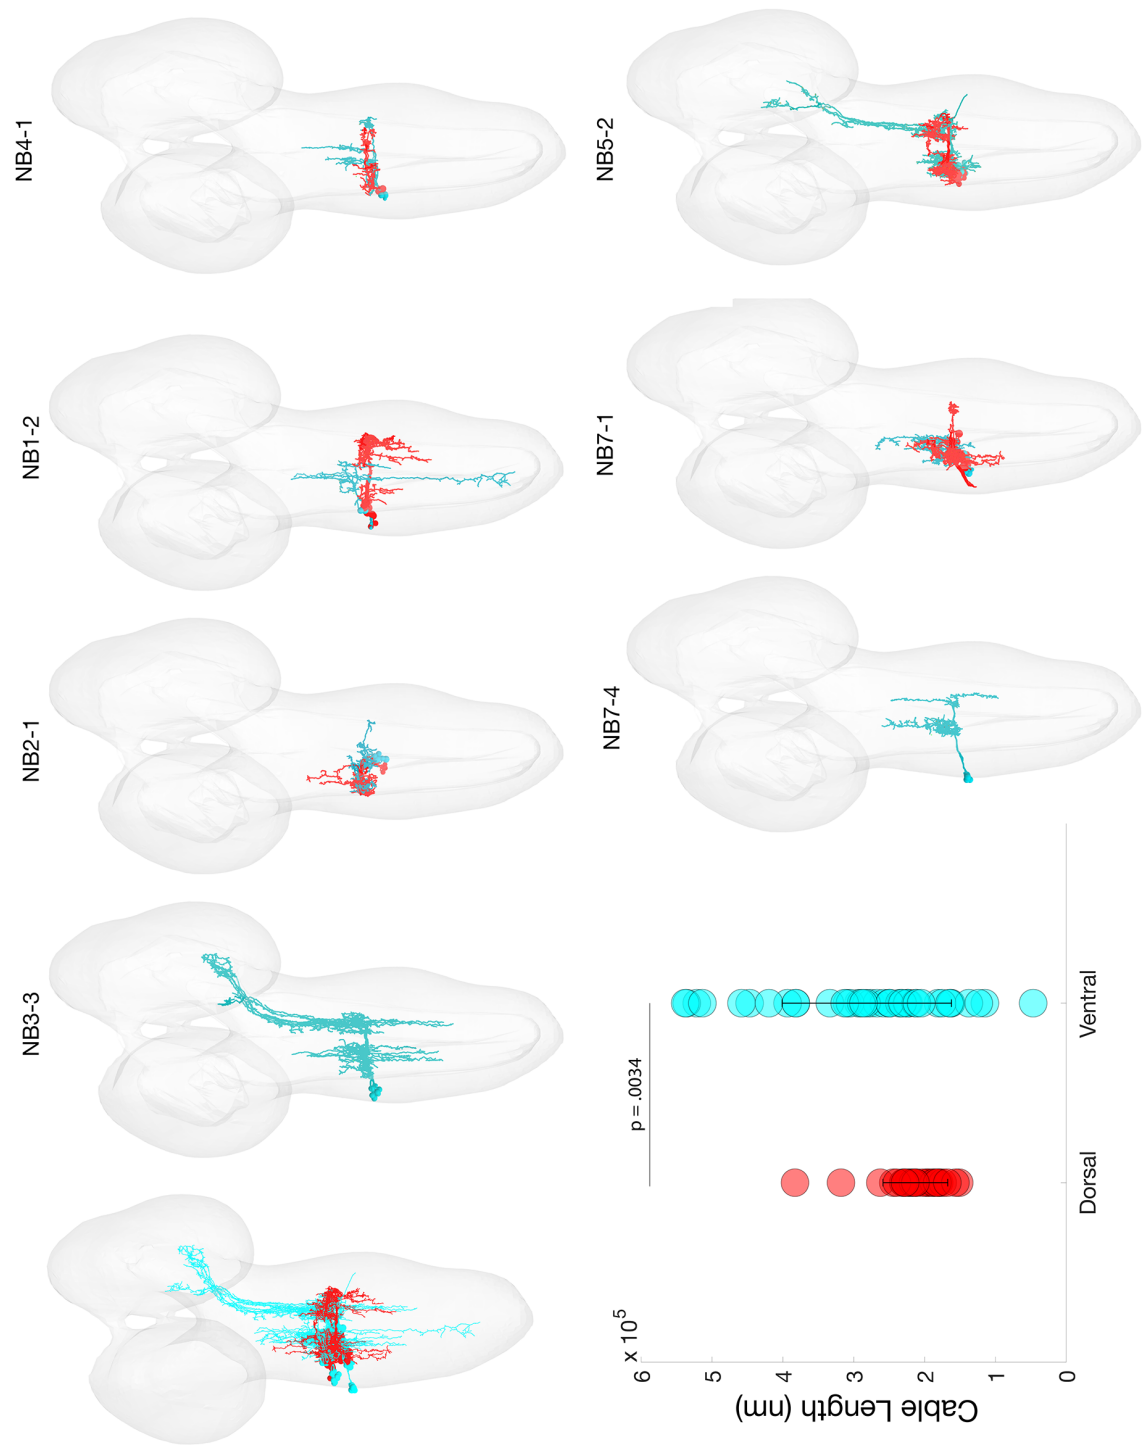

Supplemental Figure 2

646

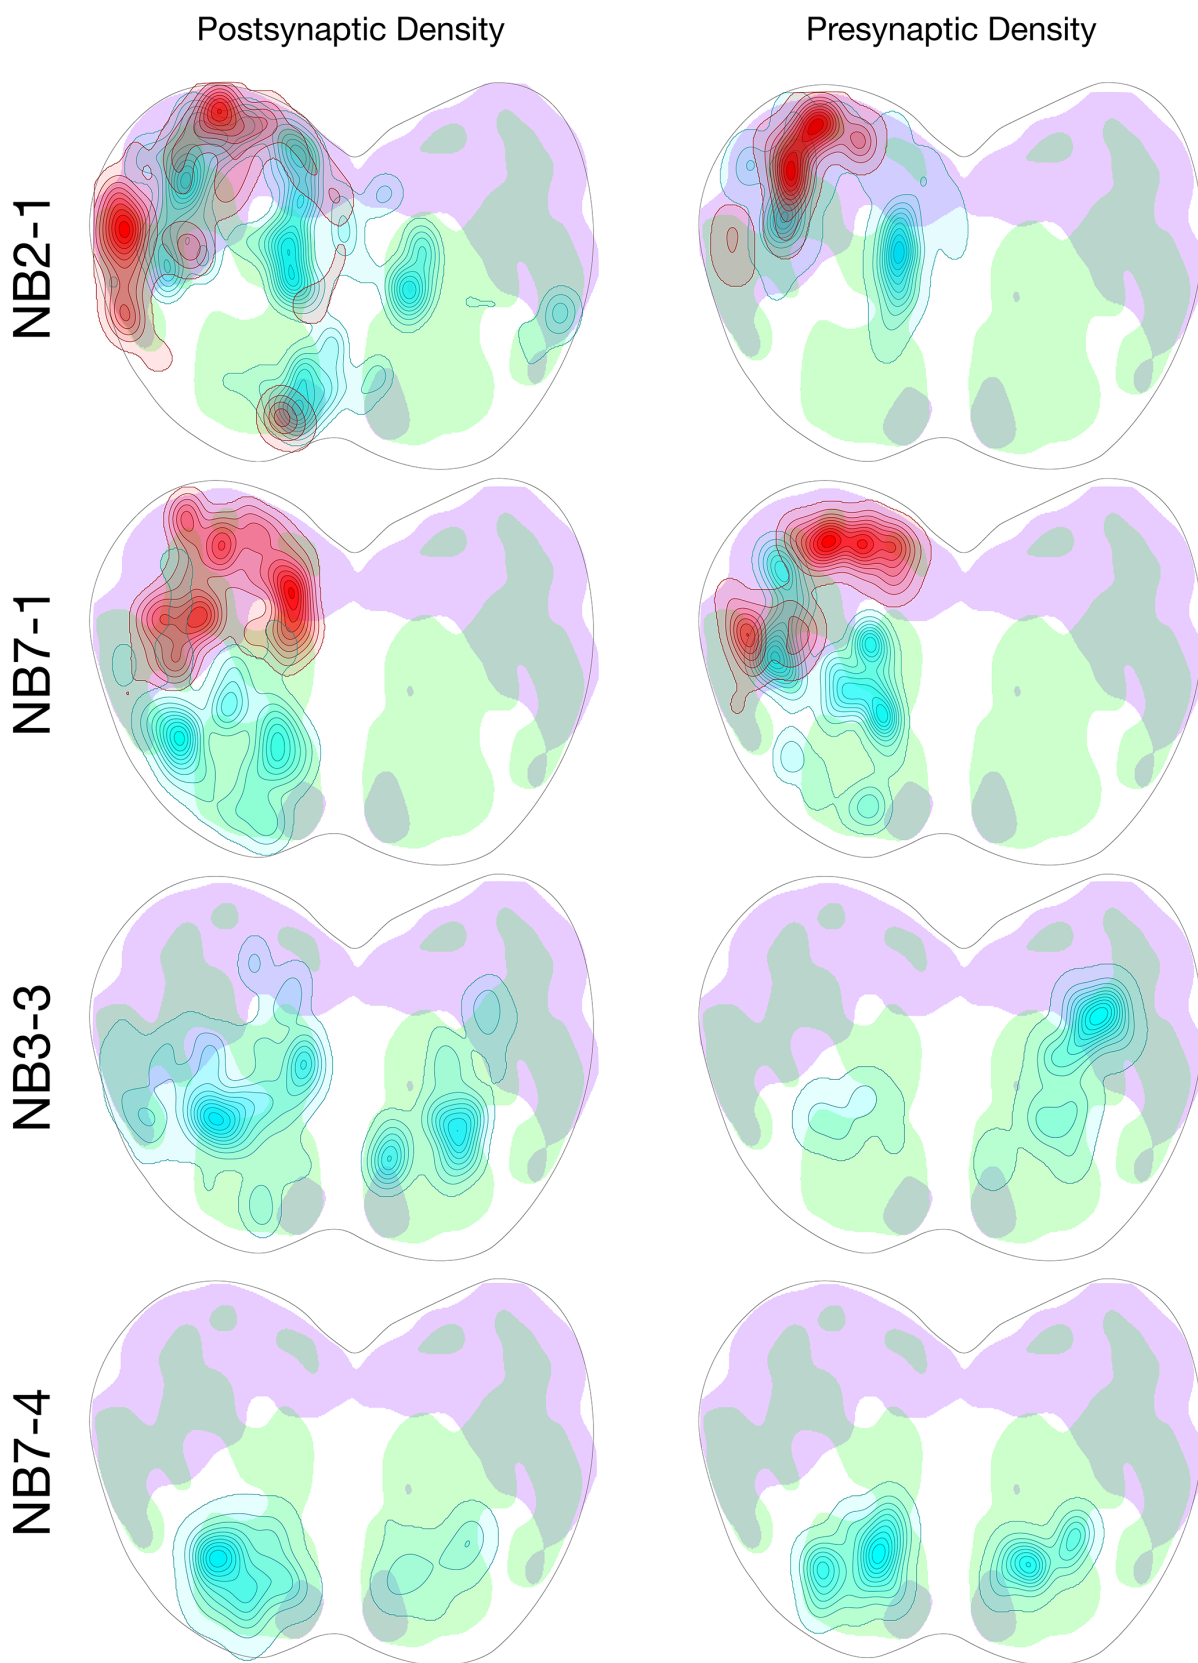

Supplemental Figure 3

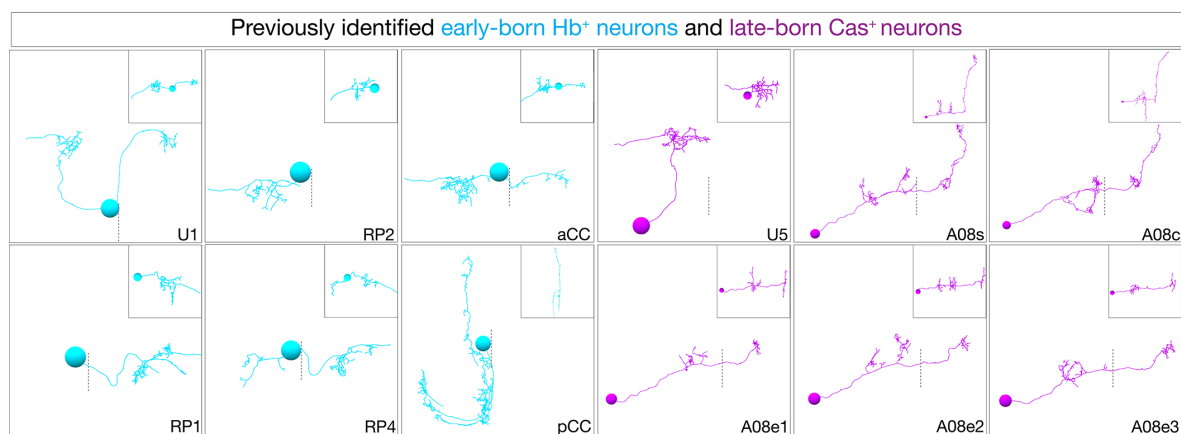

Supplemental Figure 4

648

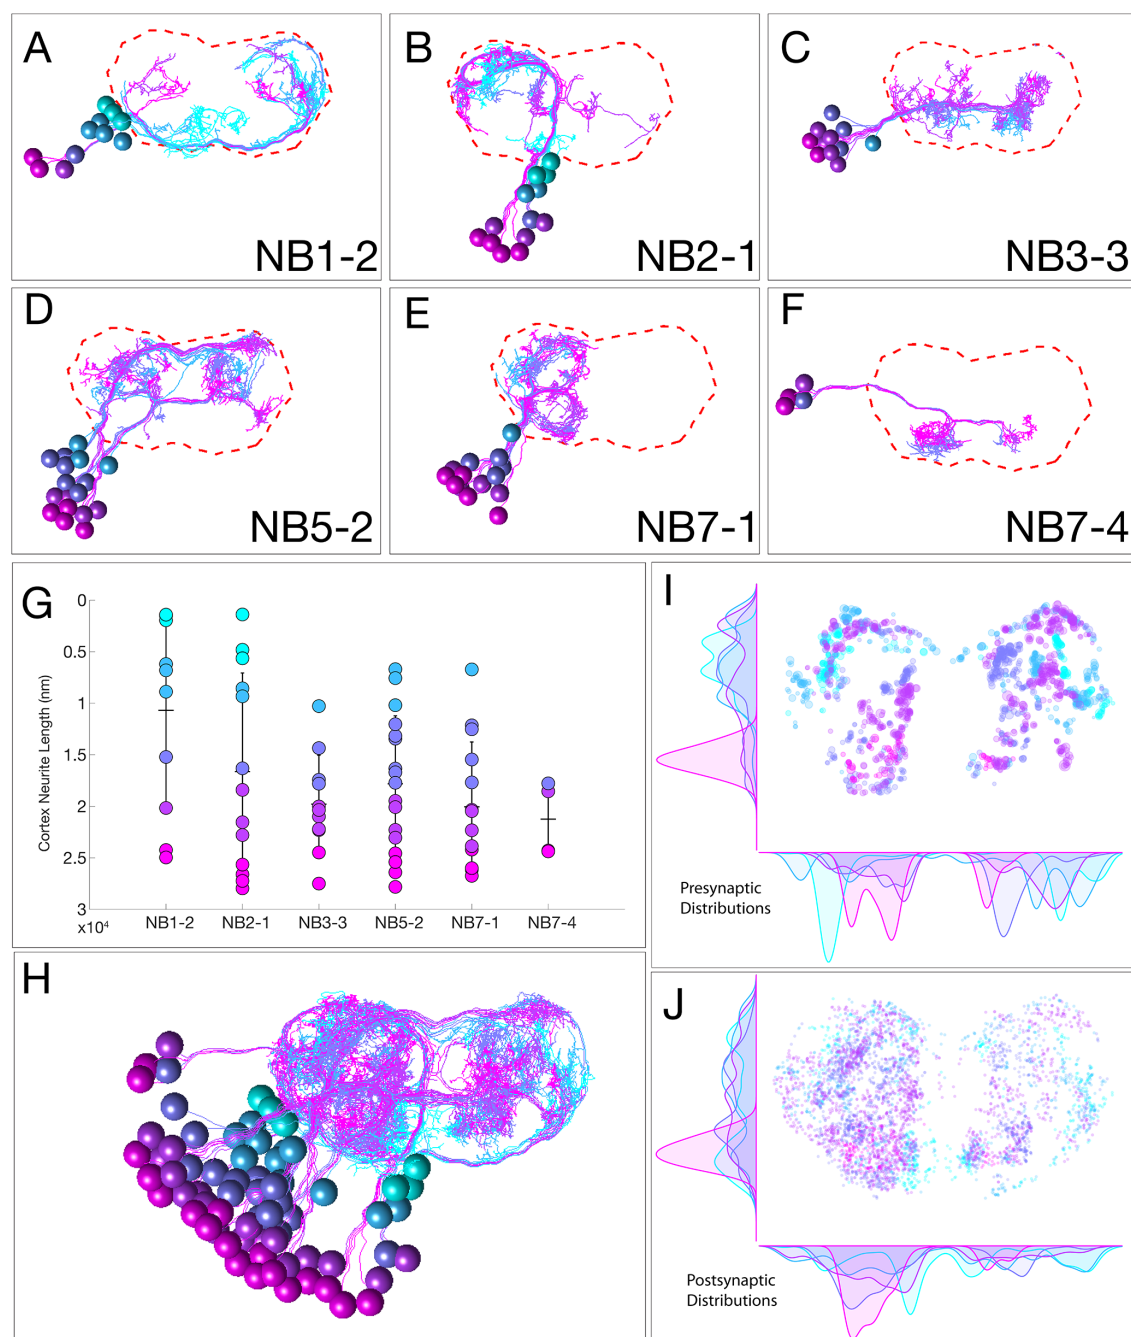

Supplemental Figure 5
